# Supplementary material for: Contractile Work Contributes to Maturation of Energy Metabolism in hiPSC-Derived Cardiomyocytes
Source: PubMed Central journal article supplement — Stem Cell Reports. 2018 Mar 1;10(3):834–47. doi: 10.1016/j.stemcr.2018.01.039 (PMC5919410; doi:10.1016/j.stemcr.2018.01.039), 2018-03-01
Supplement: mmc8.pdf [file mmc8.pdf]

# Contractile Work Contributes to Maturation of Energy Metabolism in hiPSC-Derived Cardiomyocytes

Bärbel M. Ulmer,<sup>1,2,5,\*</sup> Andrea Stoehr,<sup>3,5,6</sup> Mirja L. Schulze,<sup>1,2</sup> Sajni Patel,<sup>4</sup> Marjan Gucek,<sup>4</sup> Ingra Mannhardt,<sup>1,2</sup> Sandra Funcke,<sup>1,2</sup> Elizabeth Murphy,<sup>3</sup> Thomas Eschenhagen,<sup>1,2</sup> and Arne Hansen<sup>1,2,\*</sup>

<sup>1</sup>University Medical Center Hamburg Eppendorf, Department of Experimental Pharmacology and Toxicology, 20246 Hamburg, Germany

<sup>2</sup>German Center for Heart Research (DZHK), Partner Site Hamburg/Kiel/Lübeck, Hamburg, Germany

<sup>3</sup>Systems Biology Center, National Heart Lung and Blood Institute, National Institutes of Health, Bethesda, MD 20892, USA

<sup>4</sup>Proteomics Core Facility, National Heart Lung and Blood Institute, National Institutes of Health, Bethesda, MD 20892, USA

<sup>5</sup>Co-first author

<sup>6</sup>Present address: Integrated Cardio Metabolic Center (ICMC), Karolinska Institutet, 14157 Huddinge, Sweden

\*Correspondence: [b.ulmer@uke.de](mailto:b.ulmer@uke.de) (B.M.U.), [ar.hansen@uke.de](mailto:ar.hansen@uke.de) (A.H.)

<https://doi.org/10.1016/j.stemcr.2018.01.039>

## SUMMARY

Energy metabolism is a key aspect of cardiomyocyte biology. Human induced pluripotent stem cell-derived cardiomyocytes (hiPSC-CMs) are a promising tool for biomedical application, but they are immature and have not undergone metabolic maturation related to early postnatal development. To assess whether cultivation of hiPSC-CMs in 3D engineered heart tissue format leads to maturation of energy metabolism, we analyzed the mitochondrial and metabolic state of 3D hiPSC-CMs and compared it with 2D culture. 3D hiPSC-CMs showed increased mitochondrial mass, DNA content, and protein abundance (proteome). While hiPSC-CMs exhibited the principal ability to use glucose, lactate, and fatty acids as energy substrates irrespective of culture format, hiPSC-CMs in 3D performed more oxidation of glucose, lactate, and fatty acid and less anaerobic glycolysis. The increase in mitochondrial mass and DNA in 3D was diminished by pharmacological reduction of contractile force. In conclusion, contractile work contributes to metabolic maturation of hiPSC-CMs.

## INTRODUCTION

Human cardiomyocytes differentiated from induced pluripotent stem cells (hiPSC-CMs) are becoming an important source of human cardiomyocytes for biomedical applications such as preclinical drug testing and disease modeling. However, a current limitation for some of these applications is the immaturity of hiPSC-CMs regarding key parameters such as force of contraction, electrical activity, calcium handling, and metabolism (Denning et al., 2016; Yang et al., 2014a). Enhancing maturation of hiPSC-CMs is therefore a priority in the field. Different approaches including long-term culture (Bhute et al., 2017; Dai et al., 2017; Lundy et al., 2013), maturation media containing compounds such as T3 or fatty acids and others (Birket et al., 2013; Correia et al., 2017; Drawnel et al., 2014; Kim et al., 2013; Mills et al., 2017; Rana et al., 2012; Yang et al., 2014b), overexpression of *LET-7* microRNA (Kuppusamy et al., 2015), and electrical pacing during three-dimensional (3D) tissue culture (Nunes et al., 2013) succeeded in improving certain aspects of mitochondrial maturation.

Energy metabolism is a key aspect of cardiomyocyte biology, changing drastically during postnatal development. In non-failing adult hearts, fatty acid is the most important source of ATP production, with a substantial contribution of lactate during physical activity (Lopaschuk and Jaswal, 2010; Quaife-Ryan et al., 2017). Relying heavily on mitochondrial oxidative metabolism to meet their constant energy demand, adult cardiomyocytes have the high-

est mitochondrial-to-cytoplasmic volume fraction of all cell types and are very sensitive to hypoxia. In fetal cardiomyocytes, in contrast, anaerobic glycolysis is a major contributor to energy supply (Pohjoismäki et al., 2013). Interestingly, in heart failure the metabolism switches to more glucose consumption (Gorski et al., 2015; Shen et al., 1999).

We recently established the hiPSC-CM engineered heart tissue (EHT) model (Mannhardt et al., 2016) based on former studies on neonatal rat and mouse, and human embryonic stem cell-derived CMs in a 3D EHT format (Hansen et al., 2010; Schaaf et al., 2014; Stoehr et al., 2014). In EHT, hiPSC-CMs are embedded in a fibrin-based matrix between flexible silicone posts, enabling spontaneous, coherent, auxotonic contraction and force development. We demonstrated advanced morphological maturation regarding cellular alignment and sarcomeric organization as well as responses to physiological and pharmacological stimuli similar to non-failing human heart tissue (Mannhardt et al., 2016; Uzun et al., 2016). As this suggests an improved maturation status of 3D hiPSC-CMs, we hypothesized that hiPSC-CMs might also develop a higher degree of metabolic maturity in this format, i.e., having less fetal-like glycolysis and more adult-like mitochondrial oxidative metabolism.

To assess this, we compared the metabolic properties of hiPSC-CMs from two established control cell lines cultured in 3D versus two-dimensional (2D) monolayer culture. Our findings suggest that culturing hiPSC-CMs in 3D format improves metabolic maturation and promotes a switch from glycolysis to oxidation, mimicking important metabolic

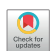

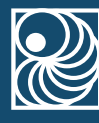

aspects of early postnatal development. These findings will increase the relevance of hiPSC-CMs for drug testing and disease modeling, particularly for diseases associated with alterations in cardiac energetics or mitochondrial abnormalities.

## RESULTS

### Culture of hiPSC-CMs as 3D Engineered Heart Tissue Improves Mitochondrial Structure

hiPSC lines from two healthy donors were differentiated utilizing an embryoid body (EB)-based protocol (Breckwoldt et al., 2017) (Movie S1). EBs were dissociated into single cells, and differentiation runs consisting of 55%–98% cardiac troponin T-positive hiPSC-CMs were cultured in 40% oxygen in parallel as either 2D monolayer or 3D EHT, respectively (Figure 1A). Phase-contrast microscopy imaging of coherently beating hiPSC-CMs showed the typical irregular alignment of hiPSC-CMs in 2D (Figure 1B and Movie S1) compared with a biconcave shape of hiPSC-CM network in 3D format after 3 weeks of culture (Figure 1C and Movie S1). Figure 1D describes force development of hiPSC-EHTs over time (frequency depicted in Figure S1B). Functional experiments were performed with cell line-, differentiation run-, and age-matched 2D and 3D preparations in parallel between days 21 and 45 of EHT development (box in Figure 1D). Similar cellular composition of 2D and 3D format by the time of functional analysis was determined by qPCR. Figure 1E demonstrates that gene expression for cardiac (*MYL3*, *MYL4*, *cTNT1*), fibroblast (*Vimentin*, *POSTN*), and endothelial (*CD31*) markers were not significantly different between 2D and 3D format ( $p > 0.05$ ). Transmission electron microscopy (TEM) analysis showed that 3D hiPSC-CMs contained more mitochondria with crisp membrane structures and cristae formation (black arrows in Figures 1F, 1G, and S1C–S1F) compared with less developed mitochondria (white arrows, Figures 1F' and 1G') in 2D hiPSC-CMs. In addition, more glycogen deposits (black granules, open arrowhead, Figures 1F', 1G', and S1C–S1F) were visible in 2D hiPSC-CMs, as described previously (Courtot et al., 2014).

### Quantitative Proteomics Revealed Greater Abundance of Mitochondrial Proteins in 3D and Nuclear and Ribosomal Proteins in 2D hiPSC-CMs

For a quantitative assessment, we performed an unbiased proteomic comparison of 2D and 3D with lysed, time-matched samples from the same hiPSC-CM batch (Figure S2A). liquid chromatography-tandem mass spectrometry (LC-MS/MS) analysis on an Orbitrap Fusion mass spectrometer identified 1,222 proteins, 697 of which were present in at least two of three samples in 2D and 3D

hiPSC-CMs. Scatterplots of  $\log_{10}$  normalized spectral counts showed low variance as characterized by high values of  $R^2$  between the samples of the respective groups (Figure S2B). A total of 614 proteins, which were detected in three of three samples of both groups, underwent comparative quantitative analysis. Quantitative analysis showed that there were clear differences between the proteomic profiles of 2D and 3D cardiomyocytes (Figure 2A and Table S1). Among these 614 proteins, 256 (41%) significantly differed in abundance between the groups, 133 proteins being more and 123 proteins less abundant in 3D than in 2D hiPSC-CMs ( $p < 0.05$ ; Tables S1 and S2). Interestingly, 93 of 256 proteins with altered abundance were mitochondrial proteins, all of which were more abundant in 3D (highlighted in Table S1). For nuclear proteins, ~75% showed lower abundance in 3D than in 2D. Most of the ribosomal proteins with significant differences showed also lower abundance in 3D than in 2D. To gain more insight into differences between proteins of cellular compartments, we performed volcano and scatterplot analyses, which showed clear differences in the proteomic profiles of subcellular compartments by highlighting nuclear, mitochondrial, and ribosomal proteins (Figures 2B and 2C), very similar to the proteome difference between fetal and adult non-failing human heart (Pohjoismäki et al., 2010). Figure 2C shows relevant cardiac proteins such as troponin C, titin, myosin heavy chain 6 and 7, and myosin light chain 2, which were all more abundant in 3D than in 2D. Cardiac proteins such as troponin I were less abundant in 3D in comparison with 2D. We further analyzed the abundance of fatty acid oxidation proteins in 3D versus 2D and highlighted 11 proteins that were higher in abundance in 3D in comparison with 2D (Figure 2D). We next searched the proteomic profiles of 2D and 3D hiPSC-CMs for the proteins with the largest differences in protein abundance. We found that extracellular matrix proteins laminin subunits  $\beta 1$  (LAMB1) and  $\gamma 1$  (LAMC1) as well as fibrillin-2 (FBN2) were abundant in 3D, but not 2D cultures (Table S1). Mitochondrial proteins made up the rest of the ten proteins that were most abundant in 3D versus 2D format. These included ATP synthase subunit  $\gamma$  (ATPG), succinyl-CoA:3-ketoacid coenzyme A transferase 1 (SCOT1), aldehyde dehydrogenase (ALDH), 3-ketoacyl-CoA thiolase (THIM), isocitrate dehydrogenase (NAD) subunit  $\gamma$  (IDH3G), NADH dehydrogenase (ubiquinone) 1 $\beta$  subcomplex subunit 9 (NDUB9), and dynamin-like 120-kDa protein (ODPA) (Table S1).

### Cardiomyocytes in 3D Cultures Exhibit Increases in Proteins Involved in ATP Synthesis and Fatty Acid Oxidation

A gene ontology analysis with the Genomatrix Genome Analyzer software for biological processes revealed that

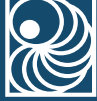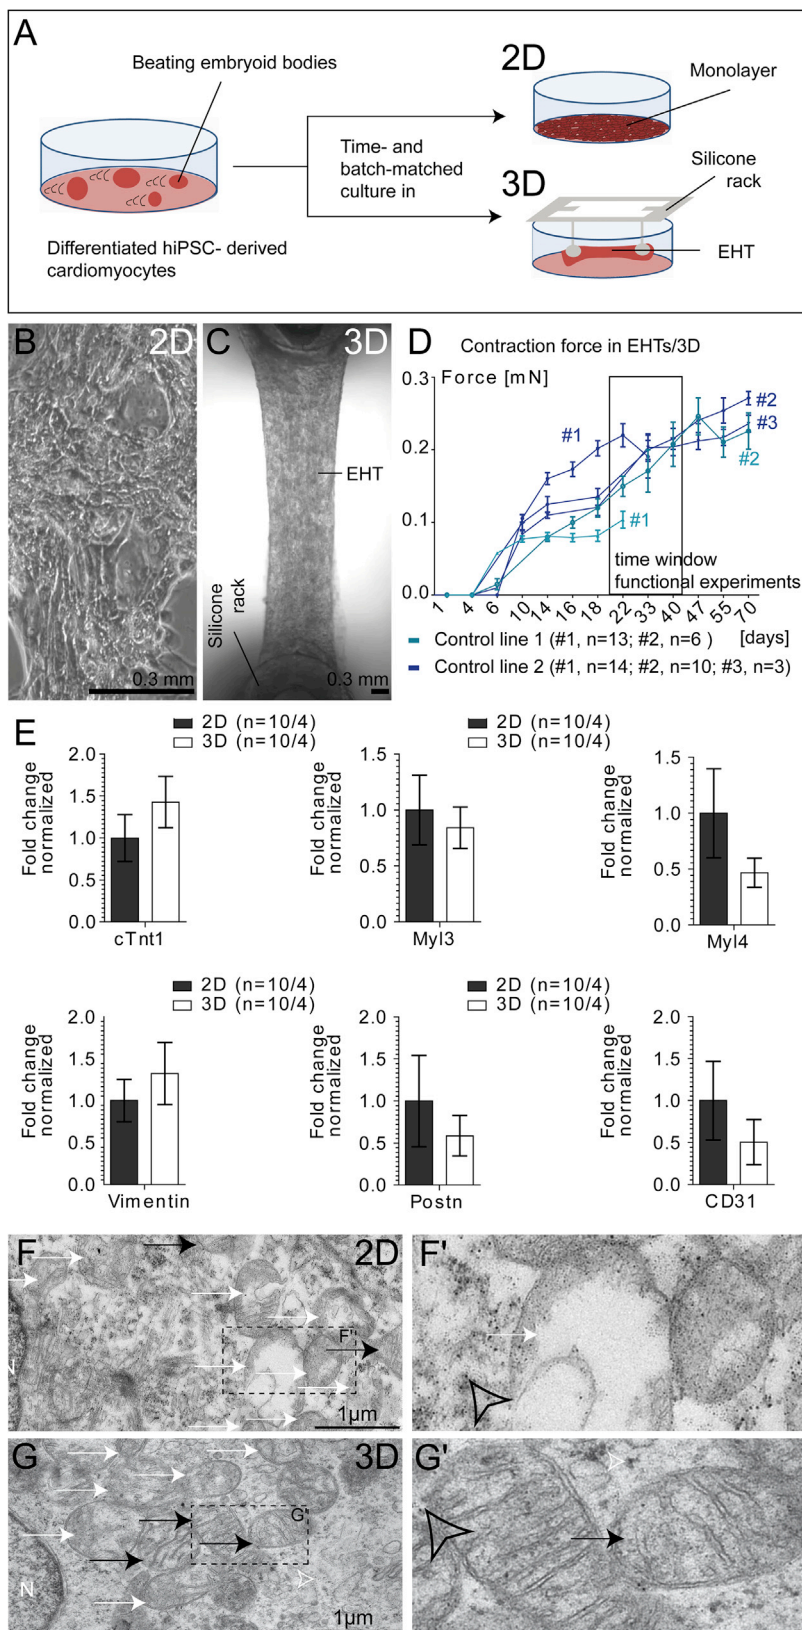

### Figure 1. 2D and 3D Culture of Human Induced Pluripotent Stem Cell-Derived Cardiomyocytes

(A) Schematic depiction of experimental setup. (B and C) Bright-field image of representative 2D and 3D hiPSC after 3 weeks; still frame from [Movie S1](#).

(D) Force development of 3D hiPSC-CMs. Black frame indicates time window for functional analyses.

(E) qPCR results of 2D and 3D hiPSC-CMs for cardiomyocyte (*MYL3*, *MYL4*, *cTNT1*), fibroblast (vimentin, *POSTN*), and endothelial (*CD31*) markers. (F and G) Transmission electron microscopy (TEM) pictures in 2D compared with 3D hiPSC-CMs (black arrow, mitochondria; white arrow, degenerated mitochondria). (F') and (G') are blow-ups of dashed boxes in (F) and (G) (open arrowheads: glycogen granules); samples prepared from one experiment.

n denotes biological replicates/independent experiments of both control cell lines; error bars show means  $\pm$  SEM. Related data are depicted in [Figure S1](#) and [Movie S1](#).

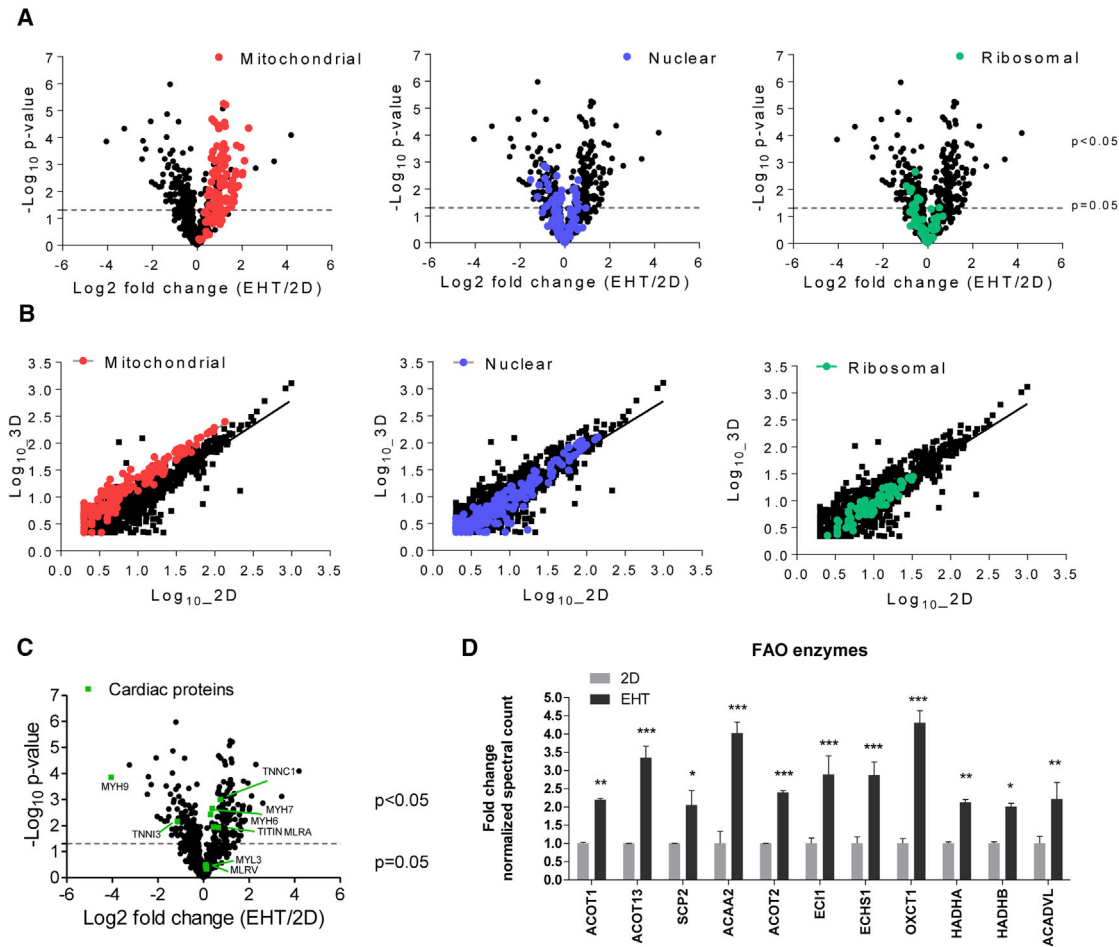

**Figure 2. Quantitative Analysis of Proteomic Profiles of Human iPSC-Derived 2D or EHT Samples**

(A) Volcano plots to compare the mean  $\log_2$  fold changes (EHT/2D) of normalized spectral counts and the  $\log_{10}$  of the p values obtained in t test comparison. Protein classes are highlighted. Note the strong presence of mitochondrial proteins in 3D samples.

(B) Scatterplots demonstrating the mean  $\log_{10}$  normalized spectral counts of 2D and 3D hiPSC-CMs. Proteins enriched in 3D are located above the line of best fit and vice versa for 2D. Protein classes are highlighted.

(C) Volcano plot showing main cardiac proteins highlighted in green.

(D) Examples of mitochondrial protein spectral count analysis involved in fatty acid oxidation (FAO) and respiration (data extracted from A). Samples ( $n = 3$  per group) prepared from one experiment.

\* $p < 0.05$ , \*\* $p < 0.01$  and \*\*\* $p < 0.001$ , EHT versus 2D (two-way ANOVA plus Bonferroni post test); error bars show means  $\pm$  SEM. Related data are depicted in Figure S2.

processes significantly more abundant in 3D included cellular respiration, energy derivation by oxidation of organic compounds, or generation of precursor metabolites and energy as well as respiratory electron transport chain or oxidative phosphorylation (Table S3 and Figure S2C). Processes less abundant in 3D included cytoskeleton organization, protein complex subunit organization, actin filament-based processes, cellular organization, and cellular complex assembly. A pathway analysis with Ingenuity Pathway Analysis (IPA) depicted that cardiomyocytes in 3D were most significantly associated with metabolic processes as seen by the annotations “mitochondrial

dysfunction,” “oxidative phosphorylation,” or “TCA cycle,” where we found significantly different proteins to be more abundant in 3D hiPSC-CMs (Figure S2D). Other important pathways for the characterization of metabolism included fatty acid oxidation and glycolysis. Panther analysis for pathways and protein classes consistently showed that most targets more abundant in 3D hiPSC-CMs were involved in ATP synthesis and the tricarboxylic acid (TCA) cycle (10.8% each of total pathways, Figure S2E) and that the target group of proteins more abundant in 3D hiPSC-CMs was annotated to oxidoreductases (21.7% of total protein classes, Figure S2F).

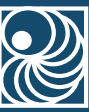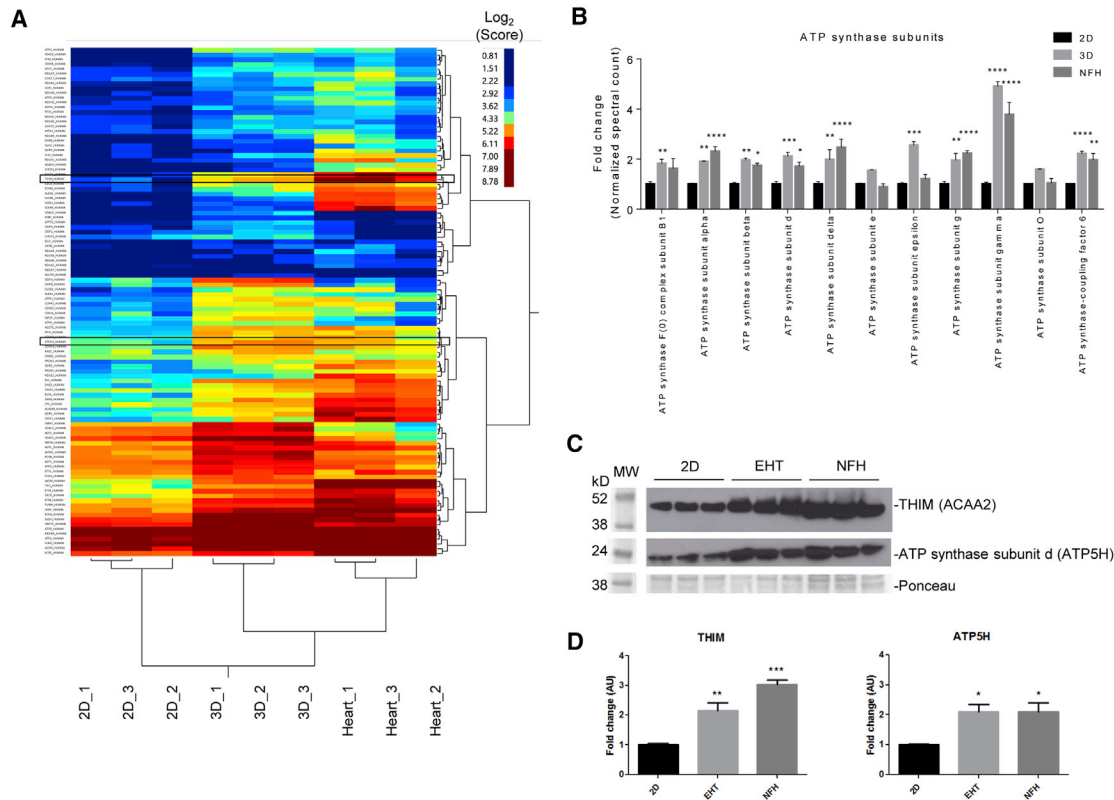

**Figure 3. Comparison of the Mitochondrial Proteome between 2D, 3D, and Non-failing Human Hearts**

(A) Clustering analysis of mitochondrial proteins for 2D and 3D hiPSCs and non-failing heart samples. Expression levels are depicted as a color code ranging from blue (low expression) to red (high expression).

(B–D) Further analysis was performed for a selection of proteins involved in fatty acid oxidation and respiratory chain. (B) Proteome data of ATP synthase subunits. (C) Western blot analysis of 2D, 3D, and NFH for mitochondrial proteins such as 3-ketoacyl-CoA thiolase (ACAA2) and ATP synthase subunit d (ATP5H) (framed in A) in comparison with Ponceau staining. (D) Quantification of western blot analysis in (C). Samples (n = 3 per group) prepared from one experiment. \*p < 0.05, \*\*p < 0.01, \*\*\*p < 0.001, and \*\*\*\*p < 0.0001 versus 2D (one-way ANOVA plus Bonferroni post test); error bars show means ± SEM. Related data are depicted in Figure S3.

### The Mitochondrial Proteomes in 3D hiPSC-CMs and Adult Human Heart Are Similar

We then compared the proteomic profiles of 2D, 3D, and non-failing adult human hearts (NFH) with a focus on the mitochondrial protein compartment. Biological replicates of all three groups clustered closely together, and 3D samples clustered nearby the heart samples (Figures 3A and S3A). The mitochondrial proteomes of 3D and NFH samples were more similar to each other than 2D to 3D or 2D to NFH. We performed gene ontology and KEGG pathway enrichment analysis of different clusters as indicated in Figure S3A. Processes such as mitochondrial electron transport and TCA cycle as well as fatty acid oxidation were particularly lower in 2D than in 3D (Figure S3B). In general, fatty acid oxidation, oxidative phosphorylation, and cardiac muscle contraction were highest in the NFH and higher in 3D than in 2D. TCA cycle and the generation of precursor metabolites and energy were particu-

larly enriched in 3D (Figure S3B). To further substantiate these findings, we specifically compared proteome data for different subunits of the ATP synthase among the groups, and found that 9 out of 11 subunits showed an ~2- to 4.5-fold increase in 3D and heart samples in comparison with 2D (p < 0.05) (Figure 3B). We verified our proteomic results in a western blot analysis and probed for ATP5H and THIM (ACAA2), which verified significantly higher abundance in 3D and NFH samples in comparison with 2D (Figures 3C and 3D).

### Increase in Mitochondrial Proteins Includes the PGC-1α (PPARGC1A) Transcriptional Regulatory Cascade and Is Accompanied by Higher Mitochondrial Mass and mtDNA Content in 3D

To better understand the molecular mechanism, we further analyzed proteins that were significantly different between 2D and 3D hiPSC-CM “Regulator Effects” using the IPA

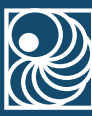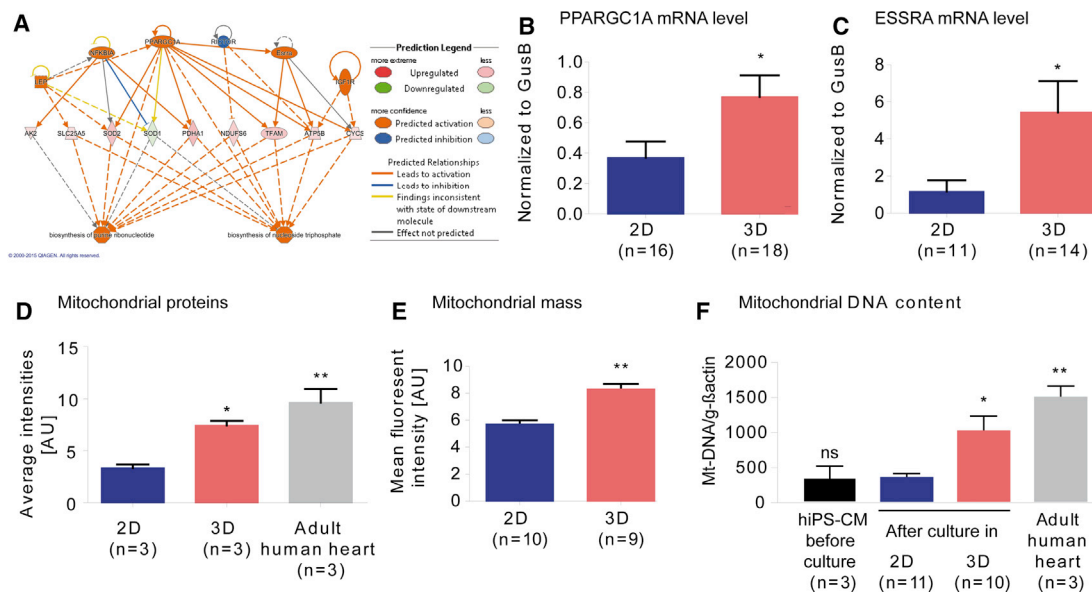

**Figure 4. Expression of Mitochondrial Biogenesis-Related PGC-1 $\alpha$  Signaling Pathway and Mitochondrial Protein, Mass, and DNA Content in hiPSC-CMs**

(A) Analysis of “Regulator Effects” by IPA of proteins significantly different between 2D and 3D: highest consistency score for effector network involved in the biosynthesis of purine ribonucleotides and nucleoside triphosphates and directed by PPARGC1/PGC-1 $\alpha$  and ESSRA, among other proteins.

(B and C) qRT-PCR for PPARGC1/PGC-1 $\alpha$  (B) and ESSRA (C).

(D) Average intensity (normalized spectral counts as a measure for relative protein abundance) between samples of mitochondrial proteins detected by quantitative proteomics in hiPSC-CMs cultured in 2D or 3D compared with non-failing heart; protein must be identified in at least 2 out of 9 samples.

(E) Quantification of flow cytometry with MitoTracker Green FM of 2D versus 3D CMs.

(F) PCR amplification of genomic DNA for the mitochondrial encoded NADH dehydrogenase (*Mt-ND1/2*), normalized to the nuclear encoded gene actin, human heart samples (1 $\times$  non-failing, 2 $\times$  terminal heart failure).

n denotes biological replicates,  $\geq 3$  independent experiments of both control cell lines. \* $p < 0.05$  and \*\* $p < 0.01$  versus 2D (two-tailed unpaired t test, B, C, and E; error bars show means  $\pm$  SEM). \* $p < 0.05$  and \*\* $p < 0.01$  versus 2D (one-way ANOVA plus Bonferroni post test, D and F; error bars show means  $\pm$  SEM; ns, not significant). Related data are depicted in Figure S4.

software. This analysis helps to understand the effects that result from differences in protein levels on molecular functions or diseases. The effectors network with the highest consistency score was shown to be the peroxisome proliferator-activated receptor  $\gamma$  coactivator 1 $\alpha$  (PGC-1 $\alpha$ /PPARGC1A) transcriptional regulatory cascade involved in the biogenesis of mitochondria, purine ribonucleotides, and nucleoside triphosphates (Dorn et al., 2015) (Figure 4A). Consistently, important upstream activators of this network are PGC-1 $\alpha$  (PPARGC1A) and estrogen-related receptor  $\alpha$  (ESRRA) both showed higher expression in 3D versus 2D hiPSC-CMs (Figures 4B and 4C). As these signaling pathways are known to be master regulators of mitochondrial biogenesis (Lehman et al., 2000; Russell et al., 2004), we hypothesized a gain in mitochondria mass in 3D hiPSC-CMs similar to early postnatal development. Comparing normalized spectral counts (as a measure of relative protein abundance) between 2D, 3D, and NFH

for all detected mitochondrial proteins (Figure 3A and Table S4; 2D, 3.3; 3D, 7.4; NFH, 9.6; protein must be detected in at least 2 out of 9 samples), we found a 2.2-fold higher amount of mitochondrial proteins in 3D than in 2D and a 2.9-fold higher amount of mitochondrial proteins in NFH than in 2D (Figure 4D). In addition to the higher abundance of mitochondrial proteins, we measured the mitochondrial mass and mtDNA content. Mitochondrial mass was analyzed by flow cytometry of live cells stained with MitoTracker Green FM, selected for localizing to mitochondria regardless of mitochondrial membrane potential. This was 1.5-fold higher in 3D than in 2D (Figures 4E and S4A). Mitochondrial encoded NADH dehydrogenase 1 and 2 (*Mt-ND1*, *Mt-ND2*) DNA levels were 3-fold higher in 3D than in 2D, but still 1.5-fold lower than in NFH (Figure 4F). To exclude that this is due to a small difference in developmental kinetics, we also analyzed ND1/2 after 70 days and confirmed the difference in ND1/2 DNA level

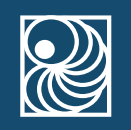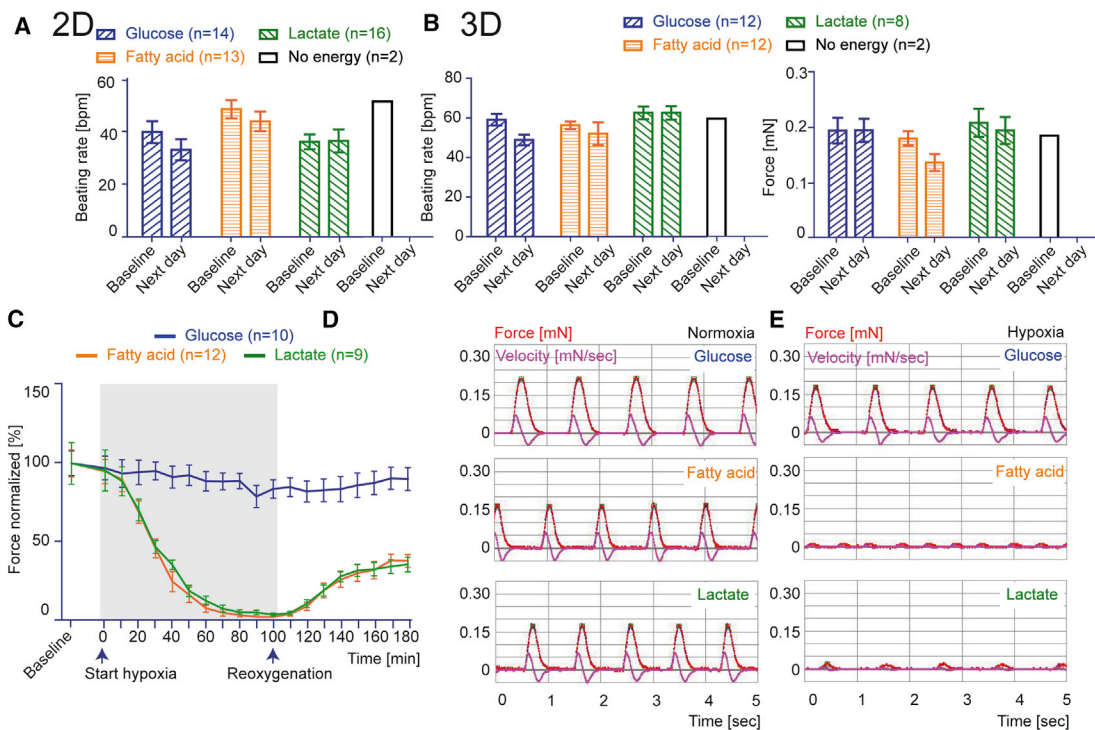

**Figure 5. Metabolic Ability of 2D CMs and 3D CMs**

(A) Beating rate for hiPSC-CMs of both control cell lines in 2D.

(B) Beating rate and contractile force for hiPSC-CMs of both control cell lines in 3D in feeding medium containing only one energy source for 20 hr, 1 mM fatty acid, 1 mM lactate, 5 mM glucose, or no energy substrate.

(C–E) Normalized force development (C) and original recordings (D and E) of 3D hiPSC-CMs during 100 min of hypoxia treatment (gray box) and reoxygenation.

n denotes biological replicates from three independent experiments of both control cell lines; error bars show means  $\pm$  SEM. Related data are depicted in [Figure S5](#) and [Movie S2](#).

([Figures S4B](#) and [S4C](#)). These data are in line with the proteomic and TEM results and suggest that mitochondrial density is 3-fold higher in 3D than in 2D, but still substantially lower than in adult human heart tissue.

### 2D and 3D hiPSC-CMs Are Able to Use Fatty Acid, Glucose, and Lactate as Sources of Energy

hiPSC-CMs in 2D and 3D format were incubated overnight in feeding medium containing only one energy source, either 1 mM fatty acid, 1 mM lactate, or 5 mM glucose. Beating frequency and contractile force as integrated parameter for the ability of hiPSC-CMs to use the different energy substrates were determined by video-optical recording for 3D hiPSC-CMs, and beating frequency was counted microscopically for 2D hiPSC-CMs. [Figures 5A](#) and [5B](#) demonstrate no significant differences at baseline and after overnight culture, demonstrating that hiPSC-CMs have the ability to use all three energy substrates. 2D and 3D hiPSC-CMs incubated in medium without any energy source stopped beating completely and could not

recover ([Figures 5A](#), [5B](#), [S5A](#), and [S5B](#)), verifying that hiPSC-CMs were not able to meet their energy needs from endogenous energy stores. To demonstrate the ability of 2D cardiomyocytes to oxidize energy substrate, we conducted the Seahorse XF Cell Mito Stress Test. Changes in the oxygen consumption rate in the presence of oligomycin, carbonyl cyanide-4-trifluoromethoxyphenylhydrazone (FCCP), and rotenone were qualitatively similar to previously reported findings in hiPSC-CMs ([Figure S5C](#)) ([Birket et al., 2015](#); [Kuppasamy et al., 2015](#)), but the Seahorse assay could not be adapted reliably to 3D culture. To demonstrate the relevance of oxidative metabolism for 3D hiPSC-CMs, we studied their hypoxia sensitivity. Since lactate and fatty acids can only be metabolized by mitochondrial aerobic respiration, we hypothesized that under these conditions the glycolysis-mediated low hypoxia sensitivity of hiPSC-CMs should be substantially increased. We tested this hypothesis by subjecting 3D hiPSC-CMs adapted to glucose, lactate, or fatty acid to a 100-min hypoxia interval followed by reoxygenation under continuous



video-optical contractility recording. Different energy substrates indeed have significant impact on hypoxia sensitivity: While force development remained unaltered under glucose conditions, it dropped to zero under lactate and fatty acid conditions and only partially recovered after switching back to 40% oxygen conditions (Figure 5C, exemplified original recordings in Figures 5D, 5E, and S5D; Movie S2).

### Anaerobic Glycolysis Decreases in Favor of More Oxidative Metabolism in 3D hiPSC-CMs

Given the fact that 2D and 3D hiPSC-CMs could metabolize all three energy substrates, we hypothesized that the difference in mitochondrial mass and DNA content might influence the amount of glycolysis and aerobic oxidation. To this end, we first analyzed glucose consumption and lactate production in hiPSC-CMs in 2D and 3D format in cell culture media containing all three energy substrates (1 mM fatty acid, 1 mM lactate, 5 mM glucose). Based on the scheme in Figure 6A, glucose consumption and lactate production were 2- to 3-fold higher in 2D hiPSC-CMs than in 3D (Figures 6B, 6C, S6A, and S6B). To determine whether this was due to overall higher metabolism in 2D or more oxidative mitochondrial metabolism in 3D, we analyzed mitochondrial flux. We supplemented cell culture media with one  $^{14}\text{C}$ -labeled energy substrate ( $^{14}\text{C}$ ]glucose,  $^{14}\text{C}$ ] lactate, or  $^{14}\text{C}$ ]oleic acid) and analyzed the production of  $^{14}\text{C}$ -labeled  $\text{CO}_2$  as a surrogate for mitochondrial TCA-cycle activity. 3D hiPSC-CMs produced several-fold more  $^{14}\text{C}$ -labeled  $\text{CO}_2$  than 2D hiPSC-CMs from oxidation of glucose (+230%), lactate (+388%), or fatty acid (+214%) (Figures 6D, 6E, 6F, and S6C–S6E). Under the assumption of a fully efficient ATP production, the total amount of ATP produced by mitochondrial respiration was 2.3-fold higher in 3D than in 2D hiPSC-CMs (671 nmol versus 291 nmol per 4-hr incubation, respectively). The relative contribution to ATP production in 2D and 3D was 49% and 14%, respectively for glycolysis (ignoring about 1% simultaneous lactate oxidation) and 40%, 9%, and 2% and 65%, 14%, and 6% for fatty acid, glucose, and lactate oxidation, respectively (Figure 6G). Taken together, these experiments imply that if all energy substrates are provided, 3D hiPSC-CMs have a higher mitochondrial metabolism, suggesting a higher metabolic preference for oxidation than glycolysis compared with 2D hiPSC-CMs.

### Pharmacological Reduction of Contraction Decreases mtDNA Content in 3D

Auxotonic contraction and defined tension are important differences between the 2D and 3D EHT model of hiPSC-CMs, and contractile work also increases substantially in early postnatal life (Stopfkuchen, 1987). We analyzed the impact of contractile work on mitochondrial mass and

DNA content by cultivating EHTs for 7 days in the presence of two different myosin II inhibitors (blebbistatin and N-benzyl-p-toluene sulfonamide [BTS]). Blebbistatin was chosen for this experiment, since it does not have off-target effects on mitochondrial metabolism in contrast to 2,3-butanedione monoxime (Hall and Hausenloy, 2016). Blebbistatin led to a reduction in force while other parameters of contraction remained unchanged (Figures 7A, 7B, and S7A–S7D). qPCR analysis revealed significantly lower copy numbers for mtDNA (Figure 7C) and lower mitochondrial mass (mitotracker fluorescence-activated cell sorting [FACS], Figure 7D). In line with this, the myosin II inhibitor BTS also led to lower mtDNA copy numbers (Figure 7E). In contrast, in 2D hiPSC-CMs both blebbistatin and BTS do not change mtDNA content (Figures S7C and S7D), suggesting that contractile work contributes to mitochondrial biogenesis in this model.

## DISCUSSION

We compared cardiomyocyte energetics of hiPSC-CMs cultured in 2D versus 3D format and found evidence for more mitochondria (TEM), mass (mitotracker), DNA (*Mt-ND1*, *Mt-ND2*), and protein abundance (proteome) in 3D format. hiPSC-CMs had the ability to use glucose, lactate, and fatty acids as energy substrates irrespective of culture format. hiPSC-CMs in 3D performed more oxidative metabolism of glucose, lactate, and fatty acid and less glycolysis, and generated 2.3-fold more ATP by oxidation than 2D hiPSC-CMs. Reduction of mitochondrial mass and DNA by pharmacological reduction of contraction in 3D points to the contribution of contractile work as one trigger of mitochondrial development.

Label-free proteomics revealed that 3D hiPSC-CMs contain more mitochondrial proteins and fatty acid-metabolizing enzymes than 2D hiPSC-CMs. In contrast, ribosomal and nuclear proteins were more abundant in 2D format. This aligns well with two recent protein-expression studies on postnatal development. Pohjoismäki et al. (2013) studied the changes in cardiac proteome during developmental hypertrophy in 16 fetal and adult non-failing heart samples by label-free proteome analysis. They discovered higher abundance of mitochondrial proteins and lower abundance of ribosomal and nuclear proteins as key changes (Pohjoismäki et al., 2013). The very same pattern was revealed in this study (Figure 2A), suggesting that mitochondrial biogenesis of early postnatal heart developmental is replicated in the 3D format. Interestingly, 3D hiPSC-CMs showed higher similarities to human ventricular heart tissue than to 2D hiPSC-CMs for proteins of the mitochondrial compartment (Figure 3A). Poon et al. (2015) studied changes in non-failing human fetal



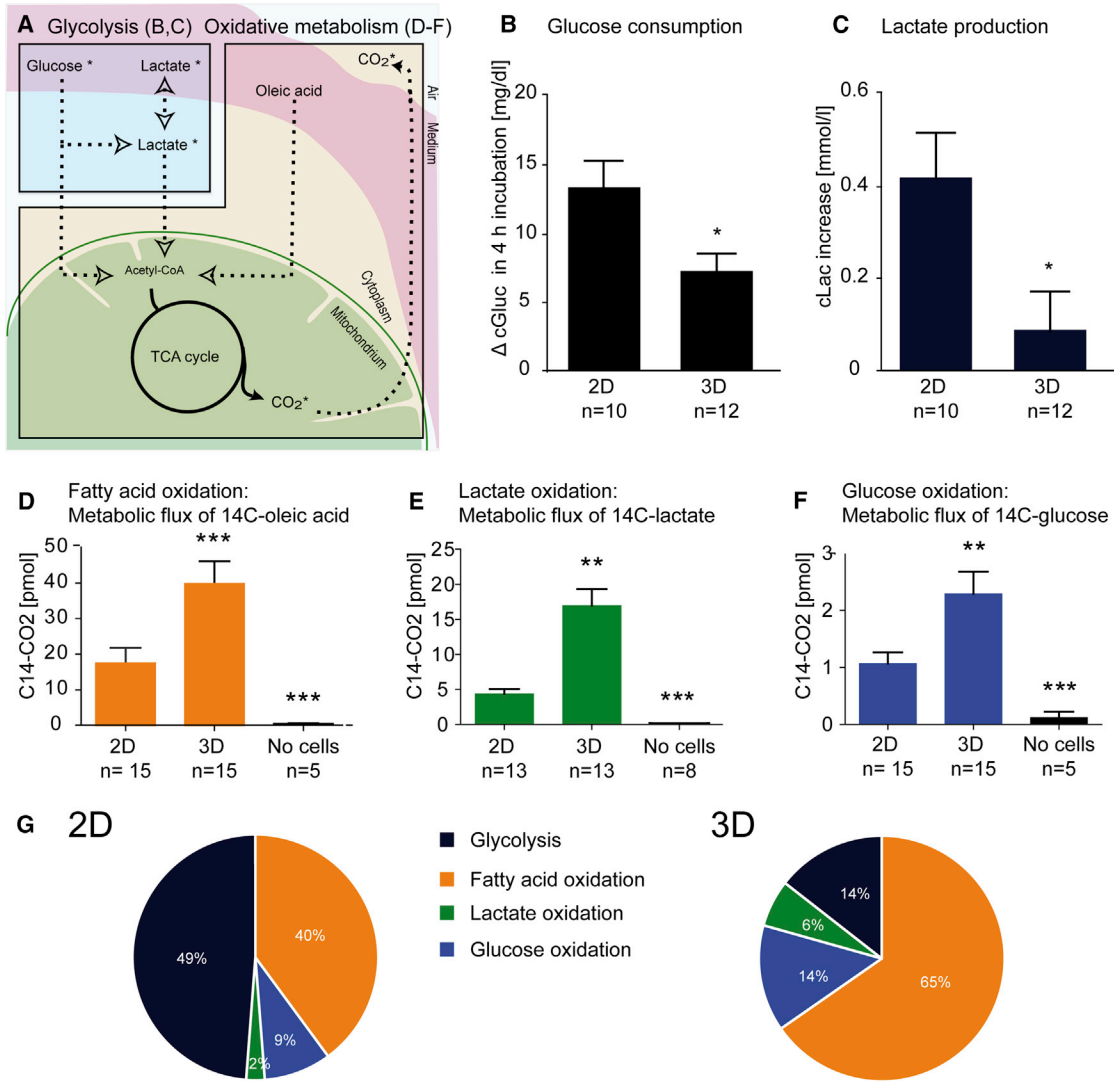

**Figure 6. Lactate Production and Oxidative Metabolism in hiPSC-CMs**

(A) Schematic depiction of metabolic processes. Glycolysis was analyzed in (B) and (C), and oxidative metabolism in (D) to (G). (B and C) Cell culture media concentration of glucose (cGluc) and lactate (cLac) after 4 hr of incubation in complete medium. Glucose consumption (B) and lactate production (C) in 2D and 3D hiPSC-CMs. (D–F) Analysis of metabolic flux for radioactive  $^{14}\text{C}$ -labeled oleic acid (D), [ $^{14}\text{C}$ ]lactate (E), or [ $^{14}\text{C}$ ]glucose (F) after 4 hr of incubation. (G) Calculated relative amount of ATP produced by oxidative metabolism and glycolysis. n denotes biological replicates from three independent experiments. \* $p < 0.05$  versus 2D (two-tailed unpaired t test, B and C; error bars show means  $\pm$  SEM). \*\* $p < 0.01$  and \*\*\* $p < 0.001$  versus 2D (one-way ANOVA plus Bonferroni post test, D–F; error bars show means  $\pm$  SEM). Related raw data of individual experiments are depicted in Figure S6.

versus adult ventricular cardiomyocytes by 2D gel electrophoresis and confirmed the strong increase in fatty acid oxidation proteins and the fetal-like protein profile of human pluripotent stem cell-derived cardiomyocytes, consistent with our 2D monolayer culture. In addition, Poon et al. (2015) demonstrated that metabolic changes were accompanied by higher protein abundance but no changes in gene expression of candidate metabolic genes were seen,

suggesting that metabolic changes are mediated by post-translational regulation. This conclusion is also supported by our data, since in contrast to marked changes in proteome profile, a recent comparison between 2D and 3D hiPSC-CMs on the transcript level did not reveal these differences (Mannhardt et al., 2016).

During postnatal metabolic development, the upregulation of mitochondrial proteins is followed by development

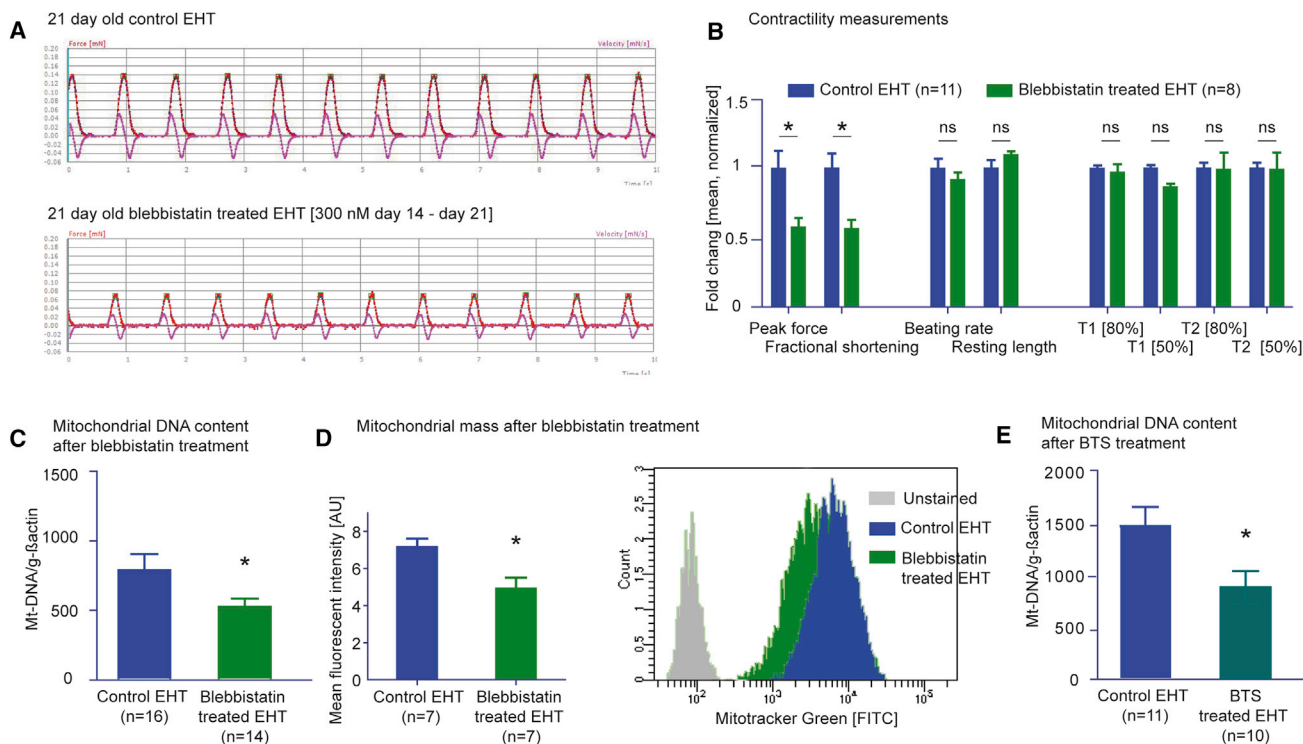

### Figure 7. Analysis of Mitochondrial Biogenesis after Pharmacological Reduction of Force

(A) Original recordings of EHTs  $\pm$  myosin II inhibitor blebbistatin (300 nM) for 7 days from day 14 to day 21.

(B) Comparison of contractility parameter of EHTs incubated  $\pm$  blebbistatin (300 nM) on day 21.

(C) PCR amplification of genomic DNA for *Mt-ND1/2*, normalized to the nuclear encoded gene actin of 3D  $\pm$  blebbistatin.

(D) MitoTracker Green FM FACS of dissociated 3D hiPSC-CMs  $\pm$  blebbistatin (300 nM).

(E) PCR amplification of genomic DNA for *Mt-ND1/2*, normalized to the nuclear encoded gene actin of 3D  $\pm$  BTS.

n denotes biological replicates from three independent experiments. \* $p < 0.05$  versus 2D (two-tailed unpaired t test); error bars show means  $\pm$  SEM. Related raw data of individual experiments are depicted in Figure S7.

of functional mitochondria and metabolic remodeling (Pohjoismäki et al., 2012). Our study indicates improved development of mitochondria in 3D culture, as mitochondrial mass and DNA content were higher (Figures 4E and 4F) and mitochondrial morphology was better (Figures 1F and 1G). In addition, we saw fewer glycogen stores in 3D hiPSC-CMs than in 2D, consistent with a reported decrease in glycogen stores from 30% of cell volume in fetal cardiomyocytes to 2% in adult cardiomyocytes (Rajabi et al., 2007). The significance of higher mitochondrial mass in the EHT model is underscored by a recent report that failed to demonstrate an increase in mtDNA in hiPSC-CMs after 3 months of culture in 2D (Bhute et al., 2017). However, we also showed that this process is not completed in 3D hiPSC-CMs. Examples of an intermediate status of 3D hiPSC-CMs include the overall still immature morphology of mitochondria in TEM (Figures 1F and 1G) and the lower level of mtDNA compared with human heart (Figure 4F). This interpretation is also supported by mitochondrial transcription factor A (TFAM) proteome data. TFAM and

mtDNA levels are interconnected, and a 5-fold increase in TFAM was observed during human heart developmental hypertrophy (Pohjoismäki et al., 2010). TFAM protein abundance was 2.9-fold higher in 3D than in 2D (2.3 in 2D versus 6.6 in 3D; Table S2), which parallels the abundance of mtDNA (2.9-fold *Mt-ND1/2*; 2D, 343; 3D, 1,024; human heart, 1,501; Figure 4F). Although direct comparison of hiPSC-CM samples (containing mostly cardiomyocytes) with adult heart samples (containing also different non-cardiomyocyte cell types) is not ideal, the substantial differences between 3D and adult heart tissue probably reflect incomplete maturation of the former.

In addition to mitochondrial development, the switch from anaerobic glycolysis to aerobic oxidative metabolism of various energy substrates is a key event in postnatal metabolic development. As a result adult cardiomyocytes are described as “omnivores,” capable of breaking down various substrates such as fatty acids, lactate, ketone bodies, and glucose for aerobic ATP production (Kolwicz et al., 2013). Neonatal cardiomyocytes metabolize various energy

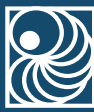

substrates. In newborn rabbit heart, glycolysis, glucose, lactate, and palmitate oxidation were shown to contribute to ATP generation by 44%, 18%, 25%, and 13%, respectively (Lopaschuk et al., 1991). In line with this, we have shown (Figure 5) that hiPSC-CMs can utilize glucose, lactate, and fatty acids as energy substrates regardless of the culture condition. The exclusively oxidative metabolism of lactate and fatty acid was demonstrated by the increased hypoxia sensitivity compared with glucose-containing medium. On the other hand, these findings also indicate that hiPSC-CMs can meet their energy demand with anaerobic glycolysis.

While both 2D and 3D hiPSC-CMs have the ability to use glucose, lactate, and fatty acids as energy substrates, hiPSC-CMs in 3D format showed higher glucose, lactate, and fatty acid oxidation, resulting in a 2.3-fold increase in ATP production by oxidation (Figure 6G) without a change in the relative composition of oxidized energy substrates. These numbers overall fit very well with postnatal changes described in other mammals (3.3-fold [Lopaschuk et al., 1991]). At the same time, the lower lactate production (as a surrogate for extracellular acidification) and glucose consumption suggests less anaerobic glycolysis in 3D (Figure 6B). We used the lactate production values (Figure 6B) to estimate ATP production by glycolysis (280 nM for 2D and 113 nM for 3D, ignoring about 1% simultaneous lactate oxidation, Figure 6G). This can be further used to estimate relative ATP production from glycolysis and oxidation (glycolysis/oxidation ratio of 51%:49% for 2D versus 14%:86% for 3D). The absolute and relative increases in aerobic metabolism are indicators of energy metabolism maturation in hiPSC-CMs during 3D culture. The relative contribution in 2D matches well with recently reported values for hiPSC-CMs (Correia et al., 2017).

In the EHT format, hiPSC-CMs are cultivated under defined tension performing auxotonic contractions between elastic polydimethylsiloxane (PDMS) posts. This might serve as a biophysical cue complementary to biochemical cues used in previous studies. The reduced mitochondrial development by pharmacological reduction of contractile force points to contractile work as one mediator of mitochondrial development (Figure 7). In contrast, there was no positive correlation of spontaneous frequency with mtDNA content (Figures S7C and S7D). Interestingly, a previous report demonstrated improved maturation and higher mitochondrial frequency by electrical pacing (Nunes et al., 2013). The maturation of mitochondrial metabolism might thus be promoted by biophysical cues, which are sensed by stretch sensors. These findings are complementary to two previous studies demonstrating structural sarcomeric (Engler et al., 2008) and mitochondrial maturation (Lyra-Leite et al., 2017) in cardiomyocytes

mediated by matrix stiffness. On the molecular level this process is accompanied with higher expression of *PGC-1* (Figure 4). Interestingly, in mouse models *PGC-1 $\alpha$ / $\beta$*  and estrogen-related receptor  $\alpha/\gamma$  drive perinatal functional and metabolic cardiac maturation (Lai et al., 2008; Wang et al., 2015), and in human embryonic stem cell-CM *PGC-1 $\alpha$*  was also shown to regulate the mitochondrial biogenesis program (Birket et al., 2013).

In summary, this study provides several lines of evidence that a 3D culture format (herein EHT) of hiPSC-CMs induces maturation of energy metabolism toward a more adult-like state. This paves the way for a more detailed study of the mechanisms of energy metabolism, combining the EHT model with previously reported biochemical and biophysical maturation cues. The establishment of an hiPSC-CM model with advanced metabolic maturation should be an important asset to the hiPSC-CM toolbox, since it allows the study of metabolic changes mediated by drugs or cardiac diseases.

## EXPERIMENTAL PROCEDURES

The study was reviewed and approved by the Ethical Committee of the University Medical Center Hamburg-Eppendorf (Az. 532/ 116/ 9.7.1991), and all patients gave written informed consent.

### Generation of Human Cardiomyocytes for Monolayer (2D) or Engineered Heart Tissue (3D)

This study was performed using a human induced pluripotent stem cell (hiPSC) control line, which was reprogrammed by lentivirus (Moretti et al., 2010). Key experiments were also verified with a second cell line, which was reprogrammed by Sendai virus according to the manufacturer's instruction (CytoTune-iPS Sendai Reprogramming Kit, #A1377801, Life Technologies). Figure S1A includes an overview of control cell lines used per experiment. Cardiac differentiation was performed with an EB-based protocol as recently described (Breckwoldt et al., 2017). Stem cell culture and mesodermal differentiation was conducted in 5% CO<sub>2</sub> and 5% O<sub>2</sub>. Cardiac differentiation was conducted in 7% CO<sub>2</sub> and atmospheric oxygen (21%). hiPSC-CMs in the EB format were subjected to collagenase digestion on day 17 after initiation of the differentiation (Breckwoldt et al., 2017; Mannhardt et al., 2017), and for each construct  $0.8 \times 10^6$  cells were used to either generate 2D or 3D samples, respectively. hiPSC-CMs were cultured in 7% CO<sub>2</sub> and 40% O<sub>2</sub> for 21–45 days and analyzed batch- and time-matched in 2D and 3D formats in parallel. 2D culture consisted of a very dense, confluent monolayer format ( $0.8 \times 10^6$  cells/2 cm<sup>2</sup> in a 24-well Nunc plate coated with 0.1% gelatin). For 3D culture,  $0.8 \times 10^6$  cells/24-well format EHT were embedded in a fibrin gel between elastic PDMS posts (Mannhardt et al., 2016). Differentiation runs with 55%–98% of cardiac troponin T-positive cells, as analyzed by flow cytometry, were utilized in this study. Force-generating EHTs constituted within 2 weeks after casting. Video-optical analysis of contractile force was performed as recently described (Hansen et al., 2010;

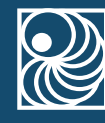

Mannhardt et al., 2016). Silicone racks (C001), Teflon spacers (C002), and EHT analysis equipment (A001) were purchased from EHT Technologies (Hamburg).

### Mass Spectrometry

Protein identification by LC-MS/MS analysis of peptides was performed using an Orbitrap Fusion Tribrid mass spectrometer (Thermo Fisher Scientific, San Jose, CA) interfaced with an Ultimate 3000 Nano-HPLC apparatus (Thermo Fisher Scientific). Peptides were fractionated by reverse-phase HPLC on a Picofrit column (250 mm long, internal diameter 75  $\mu\text{m}$ , tip internal diameter 15  $\mu\text{m}$ , packed with BetaBasic 5- $\mu\text{m}$  300- $\text{\AA}$  particles; New Objective, Woburn, MA) using a 120-min linear gradient of 5%–35% acetonitrile in 0.1% formic acid at a flow rate of 300 nL/min. Survey scans of peptide precursors from 300 to 2,000  $m/z$  were performed at 60K resolution. Tandem MS was performed with the quadrupole, HCD fragmentation with collision energy of 35, and rapid-scan MS analysis using an ion trap. The instrument was run in a top speed mode with 3-s cycles. This experiment was performed from biological replicates from one differentiation. Additional details on sample preparation and data analysis are provided online.

### Statistical Analysis

All data were expressed as means  $\pm$  SEM. Student's  $t$  test (two-tailed, homodynamic variance) was calculated in GraphPad Prism to compare between two groups, and one-way or two-way ANOVA was used for multiple comparisons of one or more factors, respectively. Technical replicates are defined as repeated measurements of the same biological replicate. Biological replicates are separate 2D/3D hiPSC-CM samples from the same differentiation. Independent experiments are 2D/3D hiPSC preparations from separate differentiations and time points. All statistical comparisons between 3D and 2D cultures were batch- and time-matched in three independent experiments, except for the proteome experiment, TEM, 70-day time point (Figure S4B), and the Seahorse experiment (SSC).

More information on all experiments is available online.

### ACCESSION NUMBERS

The MS proteomics data have been deposited to the ProteomeXchange Consortium (<http://proteomecentral.proteomexchange.org>) via the PRIDE partner repository (Vizcaíno et al., 2013) with the dataset identifier PRIDE: PXD008205.

### SUPPLEMENTAL INFORMATION

Supplemental Information includes Supplemental Experimental Procedures, seven figures, four tables, and two movies and can be found with this article online at <https://doi.org/10.1016/j.stemcr.2018.01.039>.

### AUTHOR CONTRIBUTIONS

B.M.U., A.S., T.E., and A.H. conceived and organized the project and wrote the manuscript; B.M.U., A.S., I.M., S.F., S.P., M.G., M.L.S., E.M., and A.H. contributed to experiments and data anal-

ysis. All authors discussed the results and commented on the manuscript.

### ACKNOWLEDGMENT

We thank Tessa Werner, Anika Knaust, Pierre Bobin, Kaja Breckwoldt, Birgit Klampe, Lisa Krämer, David Letuffe-Brenière, Marta Lemme, Giulia Mearini, Christiane Neuber, Sari Panjaitan, Marina Reinsch, Marita Rodriguez, Umber Saleem, Thomas Schulze, Aya Shibamiya, Simone Steuck, and Maksimilian Prondzynski for their support with stem cell culture and cardiomyocyte differentiation. We thank Elisabeth Schulze and Jutta Starbatty for expert technical help. We are very grateful to Aya Shibamiya and Sandra Laufer from the stem cell facility at the Universitätsklinikums Hamburg-Eppendorf (UKE) for providing the ERC18 control hiPSC line 2 and technical help during stem cell culture. The C25 control hiPSC line 1 was provided by the group of Alessandra Moretti, München. The C14 oxidation assay was done in the Isotope facility of the UKE; thanks to Dagmara Nelson, Ludger Scheja, Sandra Ehret, and Jörg Heeren for expert technical advice, providing chemicals, and discussing the data. The FACS analysis was done with support from the FACS Core unit of the UKE. We greatly appreciate the assistance of Susanne Krasemann (mouse pathology core facility of the UKE) in processing and imaging the TEM samples. We thank Robert Godemann for providing access and support for the Seahorse experiments. Also many thanks to the members of the laboratory and Michael J. Brownstein for discussing and editing the manuscript. I.M., T.E., and A.H. are co-founders of EHT Technologies, Hamburg. This study was supported by the European Research Council (ERC-AG IndivUHeart), Deutsche Forschungsgemeinschaft (DFG Es 88/12-1, DFG HA 3423/5-1), the British National Centre for the Replacement Refinement & Reduction of Animals in Research (NC3Rs CRACK-IT grant 35911-259146), the German Ministry of Education and Research (BMBF) and the Centre for Cardiovascular Research (DZHK), British Heart Foundation RM/13/30157, the Freie und Hansestadt Hamburg, Era-Net E-RARE (01GM1305), and the NHLBI, NIH Intramural Program.

Received: July 7, 2017

Revised: January 29, 2018

Accepted: January 30, 2018

Published: March 1, 2018

### REFERENCES

- Bhute, V.J., Bao, X., Dunn, K.K., Knutson, K.R., McCurry, E.C., Jin, G., Lee, W.H., Lewis, S., Ikeda, A., and Palecek, S.P. (2017). Metabolomics identifies metabolic markers of maturation in human pluripotent stem cell-derived cardiomyocytes. *Theranostics* 7, 2078–2091.
- Birket, M.J., Casini, S., Kosmidis, G., Elliott, D.A., Gerencser, A.A., Baartscheer, A., Schumacher, C., Mastroberardino, P.G., Elefanty, A.G., Stanley, E.G., et al. (2013). PGC-1 $\alpha$  and reactive oxygen species regulate human embryonic stem cell-derived cardiomyocyte function. *Stem Cell Reports* 1, 560–574.
- Birket, M.J., Ribeiro, M.C., Kosmidis, G., Ward, D., Leitoguinho, A.R., van de Pol, V., Dambrot, C., Devalla, H.D., Davis, R.P., Mastroberardino, P.G., et al. (2015). Contractile defect caused by mutation



- in MYBPC3 revealed under conditions optimized for human PSC-cardiomyocyte function. *Cell Rep.* *13*, 733–745.
- Breckwoldt, K., Letuffe-Brenière, D., Mannhardt, I., Schulze, T., Ulmer, B., Werner, T., Benzin, A., Klampe, B., Reinsch, M.C., Laufer, S., et al. (2017). Differentiation of cardiomyocytes and generation of human engineered heart tissue. *Nat. Protoc.* *12*, 1177–1197.
- Correia, C., Koshkin, A., Duarte, P., Hu, D., Teixeira, A., Domian, I., Serra, M., and Alves, P.M. (2017). Distinct carbon sources affect structural and functional maturation of cardiomyocytes derived from human pluripotent stem cells. *Sci. Rep.* *7*, 1–17.
- Courtot, A.-M., Magniez, A., Oudrhiri, N., Féraud, O., Bacci, J., Gobbo, E., Proust, S., Turhan, A.G., and Bennaceur-Griscelli, A. (2014). Morphological analysis of human induced pluripotent stem cells during induced differentiation and reverse programming. *Biores. Open Access* *3*, 206–216.
- Dai, D.-F., Danoviz, M.E., Wiczer, B., Laflamme, M.A., and Tian, R. (2017). Mitochondrial maturation in human pluripotent stem cell derived cardiomyocytes. *Stem Cells Int.* *2017*, 1–10.
- Denning, C., Borgdorff, V., Crutchley, J., Firth, K.S.A., George, V., Kalra, S., Kondrashov, A., Hoang, M.D., Mosqueira, D., Patel, A., et al. (2016). Cardiomyocytes from human pluripotent stem cells: from laboratory curiosity to industrial biomedical platform. *Biochim. Biophys. Acta* *11863*, 1728–1748.
- Dorn, G.W., Vega, R.B., Kelly, D.P., and Kelly, D.P. (2015). Mitochondrial biogenesis and dynamics in the developing and diseased heart. *Genes Dev.* *29*, 1981–1991.
- Drawnel, F.M., Boccardo, S., Prummer, M., Delobel, F., Graff, A., Weber, M., Gérard, R., Badi, L., Kam-Thong, T., Bu, L., et al. (2014). Disease modeling and phenotypic drug screening for diabetic cardiomyopathy using human induced pluripotent stem cells. *Cell Rep.* *9*, 810–820.
- Engler, A.J., Carag-Krieger, C., Johnson, C.P., Raab, M., Tang, H.-Y., Speicher, D.W., Sanger, J.W., Sanger, J.M., and Discher, D.E. (2008). Embryonic cardiomyocytes beat best on a matrix with heart-like elasticity: scar-like rigidity inhibits beating. *J. Cell Sci.* *121*, 3794–3802.
- Gorski, P.A., Ceholski, D.K., and Hajjar, R.J. (2015). Altered myocardial calcium cycling and energetics in heart failure—a rational approach for disease treatment. *Cell Metab.* *21*, 183–194.
- Hall, A.R., and Hausenloy, D.J. (2016). Mitochondrial respiratory inhibition by 2,3-butanedione monoxime (BDM): implications for culturing isolated mouse ventricular cardiomyocytes. *Physiol. Rep.* *4*, e12606.
- Hansen, A., Eder, A., Bönstrup, M., Flato, M., Mewe, M., Schaaf, S., Akshirlioglu, B., Schwörer, A., Uebeler, J., and Eschenhagen, T. (2010). Development of a drug screening platform based on engineered heart tissue. *Circ. Res.* *107*, 35–44.
- Kim, C., Wong, J., Wen, J., Wang, S., Wang, C., Spiering, S., Kan, N.G., Forcales, S., Puri, P.L., Leone, T.C., et al. (2013). Studying arrhythmogenic right ventricular dysplasia with patient-specific iPSCs. *Nature* *494*, 105–110.
- Kolwicz, S.C., Purohit, S., and Tian, R. (2013). Cardiac metabolism and its interactions with contraction, growth, and survival of cardiomyocytes. *Circ. Res.* *113*, 603–616.
- Kuppusamy, K.T., Jones, D.C., Sperber, H., Madan, A., Fischer, K.A., Rodriguez, M.L., Pabon, L., Zhu, W.Z., Tulloch, N.L., Yang, X., et al. (2015). Let-7 family of microRNA is required for maturation and adult-like metabolism in stem cell-derived cardiomyocytes. *Proc. Natl. Acad. Sci. USA* *112*, 2785–2794.
- Lai, L., Leone, T.C., Zechner, C., Schaeffer, P.J., Kelly, S.M., Flanagan, D.P., Medeiros, D.M., Kovacs, A., and Kelly, D.P. (2008). Transcriptional coactivators PGC-1 and PGC-1 control overlapping programs required for perinatal maturation of the heart. *Genes Dev.* *22*, 1948–1961.
- Lehman, J.J., Barger, P.M., Kovacs, A., Saffitz, J.E., Medeiros, D.M., and Kelly, D.P. (2000). Peroxisome proliferator-activated receptor gamma coactivator-1 promotes cardiac mitochondrial biogenesis. *J. Clin. Invest.* *106*, 847–856.
- Lopaschuk, G.D., and Jaswal, J.S. (2010). Energy metabolic phenotype of the cardiomyocyte during development, differentiation, and postnatal maturation. *J. Cardiovasc. Pharmacol.* *56*, 130–140.
- Lopaschuk, G.D., Spafford, M.A., and Marsh, D.R. (1991). Glycolysis is predominant source of myocardial ATP production immediately after birth. *Am. J. Physiol.* *261*, H1698–H1705.
- Lundy, S.D., Zhu, W.-Z., Regnier, M., and Laflamme, M.A. (2013). Structural and functional maturation of cardiomyocytes derived from human pluripotent stem cells. *Stem Cells Dev.* *22*, 1991–2002.
- Lyra-Leite, D.M., Andres, A.M., Petersen, A.P., Ariyasinghe, N.R., Cho, N., Lee, J.A., Gottlieb, R.A., and McCain, M.L. (2017). Mitochondrial function in engineered cardiac tissues is regulated by extracellular matrix elasticity and tissue alignment. *Am. J. Physiol. Heart Circ. Physiol.* *313*, H757–H767.
- Mannhardt, I., Breckwoldt, K., Letuffe-Brenière, D., Schaaf, S., Schulz, H., Neuber, C., Benzin, A., Werner, T., Eder, A., Schulze, T., et al. (2016). Human engineered heart tissue: analysis of contractile force. *Stem Cell Reports* *7*, 29–42.
- Mannhardt, I., Saleem, U., Benzin, A., Schulze, T., Klampe, B., Eschenhagen, T., and Hansen, A. (2017). Automated contraction analysis of human engineered heart tissue for cardiac drug safety screening. *J. Vis. Exp.* <https://doi.org/10.3791/55461>.
- Mills, R.J., Titmarsh, D.M., Koenig, X., Parker, B.L., Ryall, J.G., Quaipe-Ryan, G.A., Voges, H.K., Hodson, M.P., Ferguson, C., Drowley, L., et al. (2017). Functional screening in human cardiac organoids reveals a metabolic mechanism for cardiomyocyte cell cycle arrest. *Proc. Natl. Acad. Sci. USA* *114*, E8372–E8381.
- Moretti, A., Bellin, M., Welling, A., Jung, C.B., Lam, J.T., Bott-Flügel, L., Dorn, T., Goedel, A., Höhnke, C., Hofmann, F., et al. (2010). Patient-specific induced pluripotent stem-cell models for long-QT syndrome. *N. Engl. J. Med.* *363*, 1397–1409.
- Nunes, S.S., Miklas, J.W., Liu, J., Aschar-Sobbi, R., Xiao, Y., Zhang, B., Jiang, J., Massé, S., Gagliardi, M., Hsieh, A., et al. (2013). Biowire: a platform for maturation of human pluripotent stem cell-derived cardiomyocytes. *Nat. Methods* *10*, 781–787.
- Pohjoismäki, J.L.O., Goffart, S., Taylor, R.W., Turnbull, D.M., Suomalainen, A., Jacobs, H.T., and Karhunen, P.J. (2010). Developmental and pathological changes in the human cardiac muscle mitochondrial DNA organization, replication and copy number. *PLoS One* *5*, e10426.

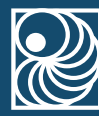

- Pohjoismäki, J.L.O., Boettger, T., Liu, Z., Goffart, S., Szibor, M., and Braun, T. (2012). Oxidative stress during mitochondrial biogenesis compromises mtDNA integrity in growing hearts and induces a global DNA repair response. *Nucleic Acids Res.* *40*, 6595–6607.
- Pohjoismäki, J.L.O., Krüger, M., Al-Furoukh, N., Lagerstedt, A., Karhunen, P.J., and Braun, T. (2013). Postnatal cardiomyocyte growth and mitochondrial reorganization cause multiple changes in the proteome of human cardiomyocytes. *Mol. Biosyst.* *9*, 1210–1219.
- Poon, E., Keung, W., Liang, Y., Ramalingam, R., Yan, B., Zhang, S., Chopra, A., Moore, J., Herren, A., Lieu, D.K., et al. (2015). Proteomic analysis of human pluripotent stem cell-derived, fetal, and adult ventricular cardiomyocytes reveals pathways crucial for cardiac metabolism and maturation. *Circ. Cardiovasc. Genet.* *8*, 427–436.
- Quaife-Ryan, G.A., Sim, C.B., Ziemann, M., Kaspi, A., Rafehi, H., Ramialison, M., El-Osta, A., Hudson, J.E., and Porrello, E.R. (2017). Multicellular transcriptional analysis of mammalian heart regeneration. *Circulation* *136*, 1123–1139.
- Rajabi, M., Kassiotis, C., Razeghi, P., and Taegtmeier, H. (2007). Return to the fetal gene program protects the stressed heart: a strong hypothesis. *Heart Fail. Rev.* *12*, 331–343.
- Rana, P., Anson, B., Engle, S., and Will, Y. (2012). Characterization of human-induced pluripotent stem cell-derived cardiomyocytes: bioenergetics and utilization in safety screening. *Toxicol. Sci.* *130*, 117–131.
- Russell, L.K., Mansfield, C.M., Lehman, J.J., Kovacs, A., Courtois, M., Saffitz, J.E., Medeiros, D.M., Valencik, M.L., McDonald, J.A., and Kelly, D.P. (2004). Cardiac-specific induction of the transcriptional coactivator peroxisome proliferator-activated receptor gamma coactivator-1alpha promotes mitochondrial biogenesis and reversible cardiomyopathy in a developmental stage-dependent manner. *Circ. Res.* *94*, 525–533.
- Schaaf, S., Eder, A., Vollert, I., Stöhr, A., Hansen, A., and Eschenhagen, T. (2014). Generation of strip-format fibrin-based engineered heart tissue (EHT). *Methods Mol. Biol.* *1181*, 121–129.
- Shen, W., Asai, K., Uechi, M., Mathier, M.A., Shannon, R.P., Vatner, S.F., and Ingwall, J.S. (1999). Progressive loss of myocardial ATP due to a loss of total purines during the development of heart failure in dogs: a compensatory role for the parallel loss of creatine. *Circulation* *100*, 2113–2118.
- Stoehr, A., Neuber, C., Baldauf, C., Vollert, I., Friedrich, F.W., Flenner, F., Carrier, L., Eder, A., Schaaf, S., Hirt, M.N., et al. (2014). Automated analysis of contractile force and Ca<sup>2+</sup> transients in engineered heart tissue. *Am. J. Physiol. Heart Circ. Physiol.* *306*, H1353–H1363.
- Stopfkuchen, H. (1987). Changes of the cardiovascular system during the perinatal period. *Eur. J. Pediatr.* *146*, 545–549.
- Uzun, A.U., Mannhardt, I., Breckwoldt, K., Horváth, A., Johansen, S.S., Hansen, A., Eschenhagen, T., and Christ, T. (2016). Ca<sup>2+</sup>-currents in human induced pluripotent stem cell-derived cardiomyocytes effects of two different culture conditions. *Front. Pharmacol.* *7*, 300.
- Vizcaíno, J.A., Côté, R.G., Csordas, A., Dianes, J.A., Fabregat, A., Foster, J.M., Griss, J., Alpi, E., Birim, M., Contell, J., et al. (2013). The PRoteomics IDentifications (PRIDE) database and associated tools: status in 2013. *Nucleic Acids Res.* *41*, D1063–D1069.
- Wang, T., McDonald, C., Petrenko, N.B., Leblanc, M., Wang, T., Giguere, V., Evans, R.M., Patel, V.V., and Pei, L. (2015). Estrogen-related receptor  $\alpha$  (ERR $\alpha$ ) and ERR $\gamma$  are essential coordinators of cardiac metabolism and function. *Mol. Cell. Biol.* *35*, 1281–1298.
- Yang, X., Pabon, L., and Murry, C.E. (2014a). Engineering adolescence: maturation of human pluripotent stem cell-derived cardiomyocytes. *Circ. Res.* *114*, 511–523.
- Yang, X., Rodriguez, M., Pabon, L., Fischer, K.A., Reinecke, H., Reginier, M., Sniadecki, N.J., Ruohola-Baker, H., and Murry, C.E. (2014b). Tri-iodo-L-thyronine promotes the maturation of human cardiomyocytes-derived from induced pluripotent stem cells. *J. Mol. Cell. Cardiol.* *72*, 296–304.

**Stem Cell Reports, Volume 10**

**Supplemental Information**

**Contractile Work Contributes to Maturation of Energy Metabolism in  
hiPSC-Derived Cardiomyocytes**

**Bärbel M. Ulmer, Andrea Stoehr, Mirja L. Schulze, Sajni Patel, Marjan Gucek, Ingra Mannhardt, Sandra Funcke, Elizabeth Murphy, Thomas Eschenhagen, and Arne Hansen**

Supplemental Information

Supplemental Figures 1-7

**A**

|              | Control cell line 1 | Control cell line 2 |
|--------------|---------------------|---------------------|
| Figure 1B, C | X                   |                     |
| Figure 1D    | X                   | X                   |
| Figure 1E    | X                   | X                   |
| Figure 1F, G | X                   |                     |
| Figure 2     | X                   |                     |
| Figure 3     | X                   |                     |
| Figure 4 A   | X                   |                     |
| Figure 4 B-F | X                   | X                   |
| Figure 5     | X                   | X                   |
| Figure 6B, C | X                   |                     |
| Figure 6D-G  | X                   | X                   |
| Figure 7     | X                   | X                   |

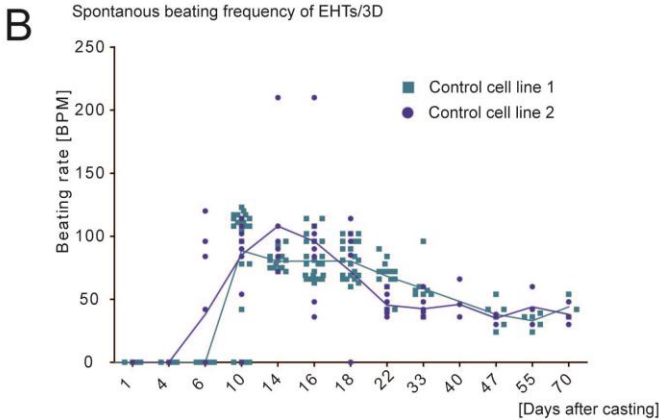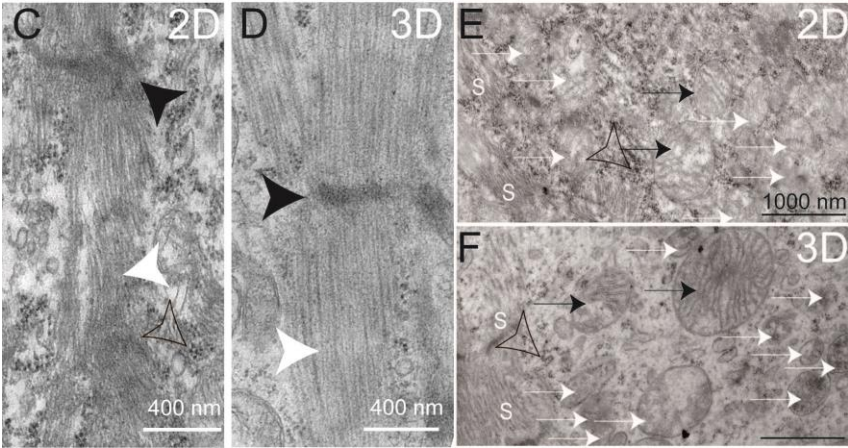

Figure S1: Overview of control cell lines (supplementary to Figure 1).



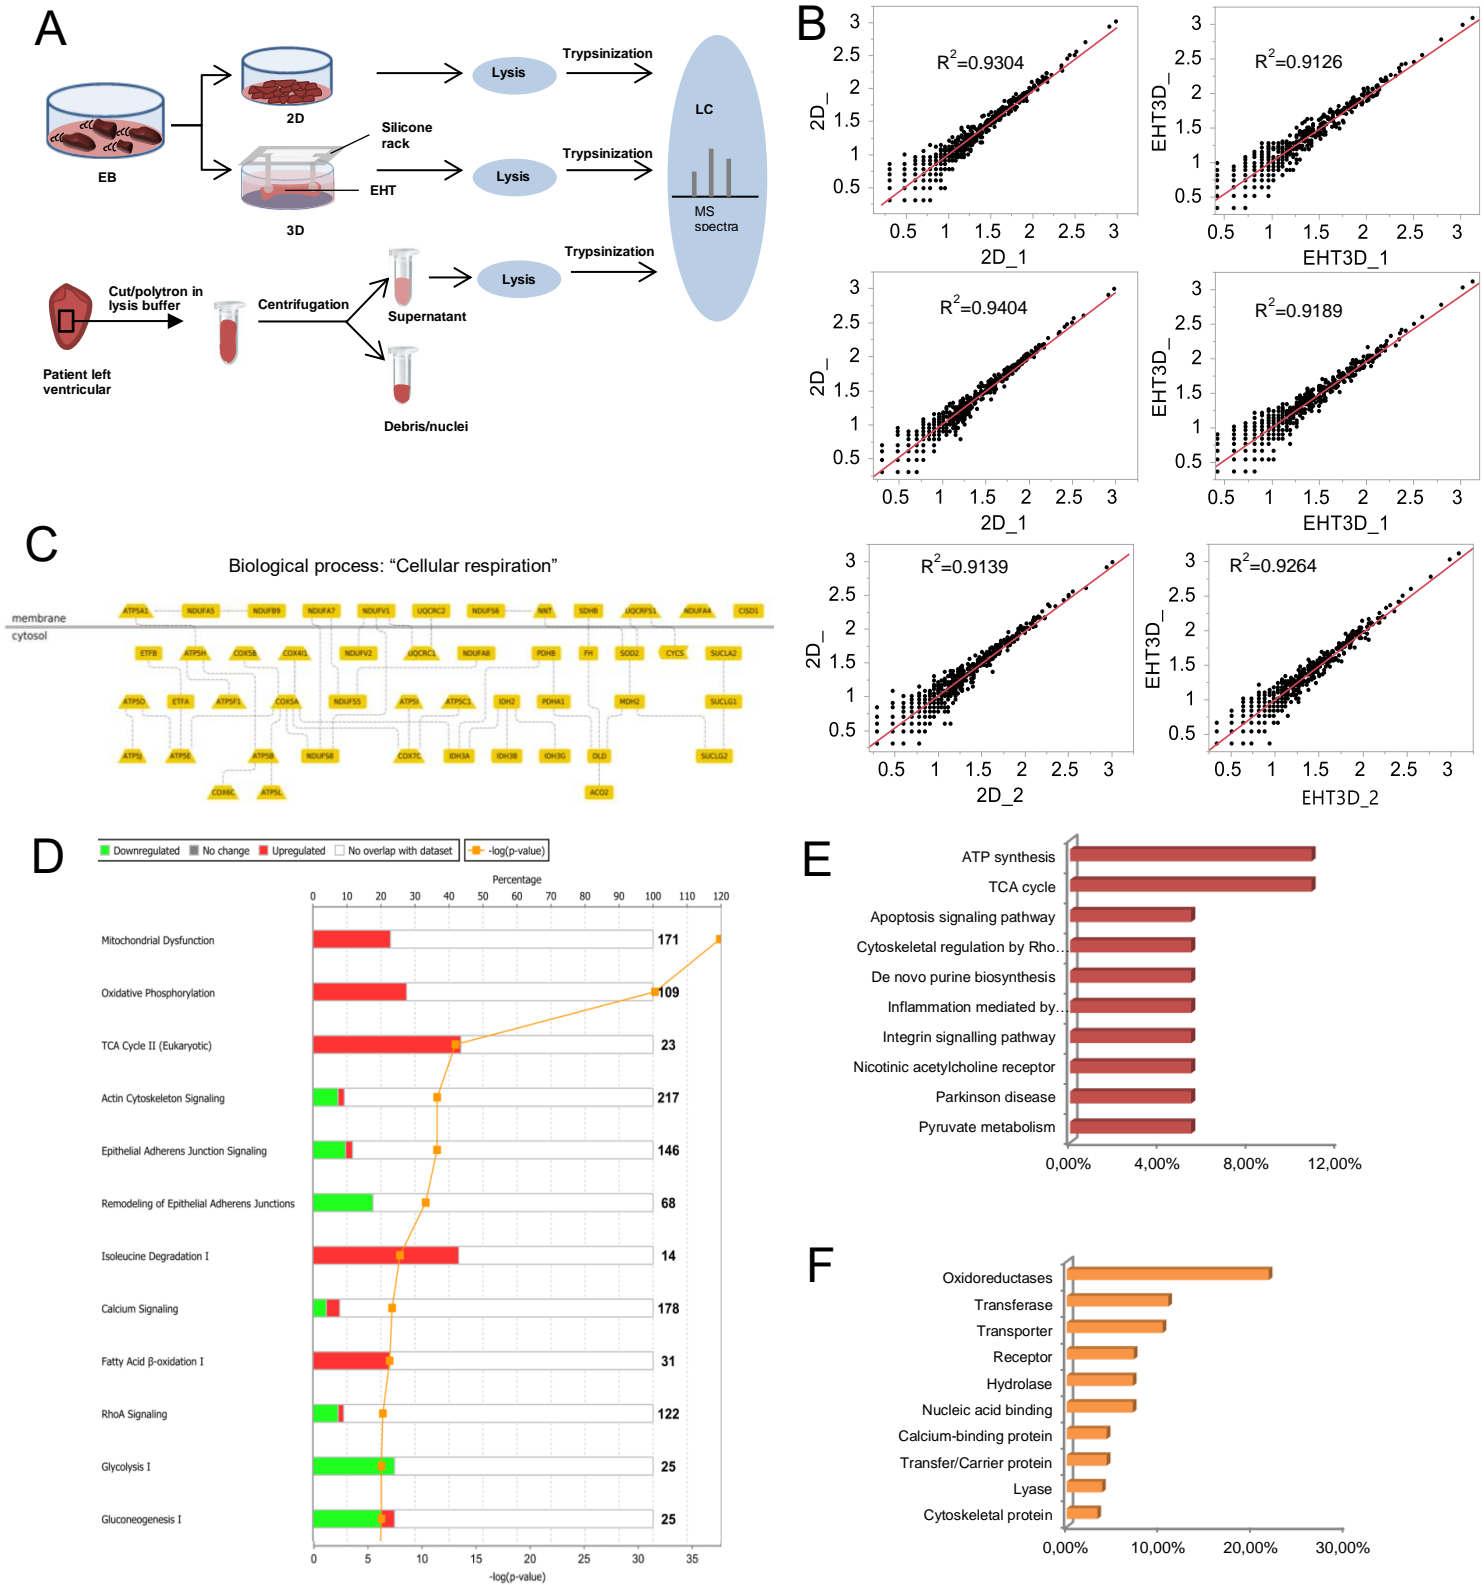

Figure S2: Work flow of mass spectrometry and protein ontology/canonical pathway analyses (supplementary to Figure 2).

A

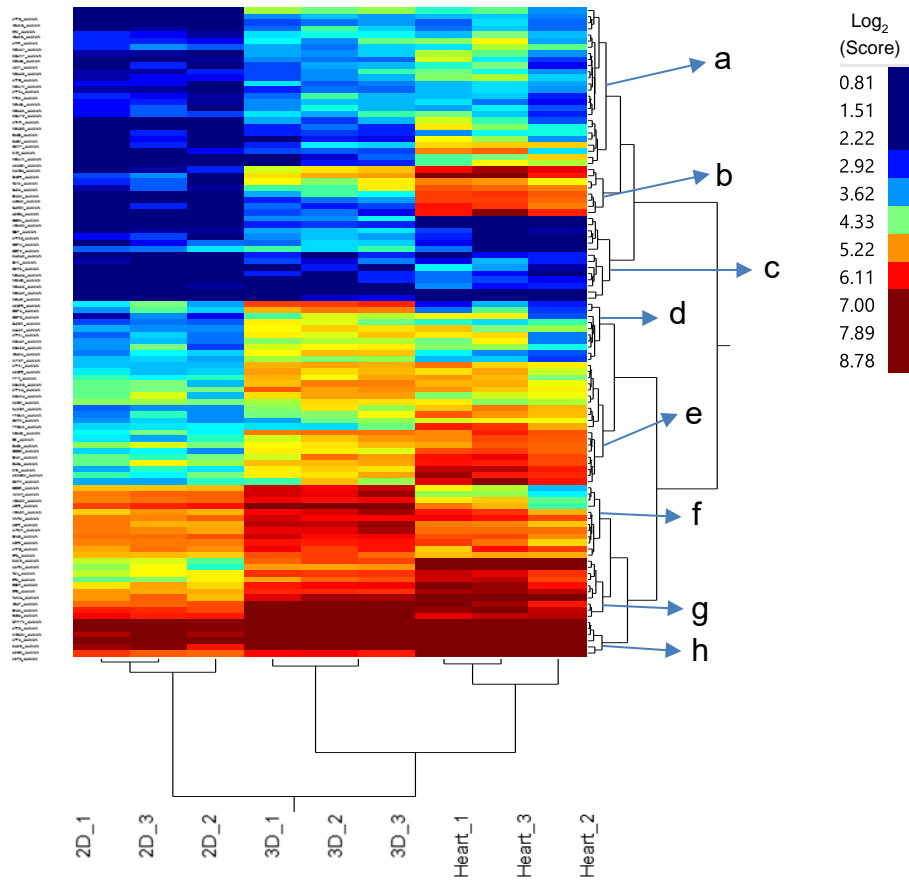

B

| Cluster | GO Biological Process                                    | KEGG Pathway                                         | Score |
|---------|----------------------------------------------------------|------------------------------------------------------|-------|
| a       | Mitochondrial electron transport, NADH to ubiquinone     | Oxidative phosphorylation                            | 12,86 |
|         | ATP biosynthetic process                                 |                                                      | 4,32  |
|         | Tricarboxylic acid cycle                                 | Citrate cycle                                        | 2,27  |
| b       | Metabolic pathways                                       | Oxidative phosphorylation                            | 4,46  |
|         | Fatty acid beta-oxidation                                | Fatty acid metabolism/Lysine degradation             | 3,78  |
|         | Response to activity                                     | Valine, leucine and isoleucine degradation           | 3,63  |
| c       | Mitochondrial electron transport, NADH to ubiquinone     | Oxidative phosphorylation                            | 5,91  |
|         |                                                          | Metabolic pathways                                   | 7,82  |
| d       | Tricarboxylic acid cycle                                 | Citrate cycle (TCA cycle)                            | 4,15  |
|         | Generation of precursor metabolites and energy           | Oxidative phosphorylation                            | 1,97  |
| e       | Mitochondrial electron transport, cytochrome c to oxygen | Oxidative phosphorylation/Cardiac muscle contraction | 5,16  |
|         |                                                          | Non-alcoholic fatty liver disease (NAFLD)            | 2,68  |
| f       | Transmembrane transport/Translation                      | Calcium signaling pathway                            | 3,89  |
|         | Transmembrane transport                                  | Calcium signaling pathway                            | 3,39  |
|         |                                                          | Metabolic pathways                                   | 2,56  |
| g       |                                                          | Metabolic pathways                                   | 5,26  |

Figure S3: Gene ontology and KEGG pathway analysis performed for specific clusters (supplementary to Figure 3).

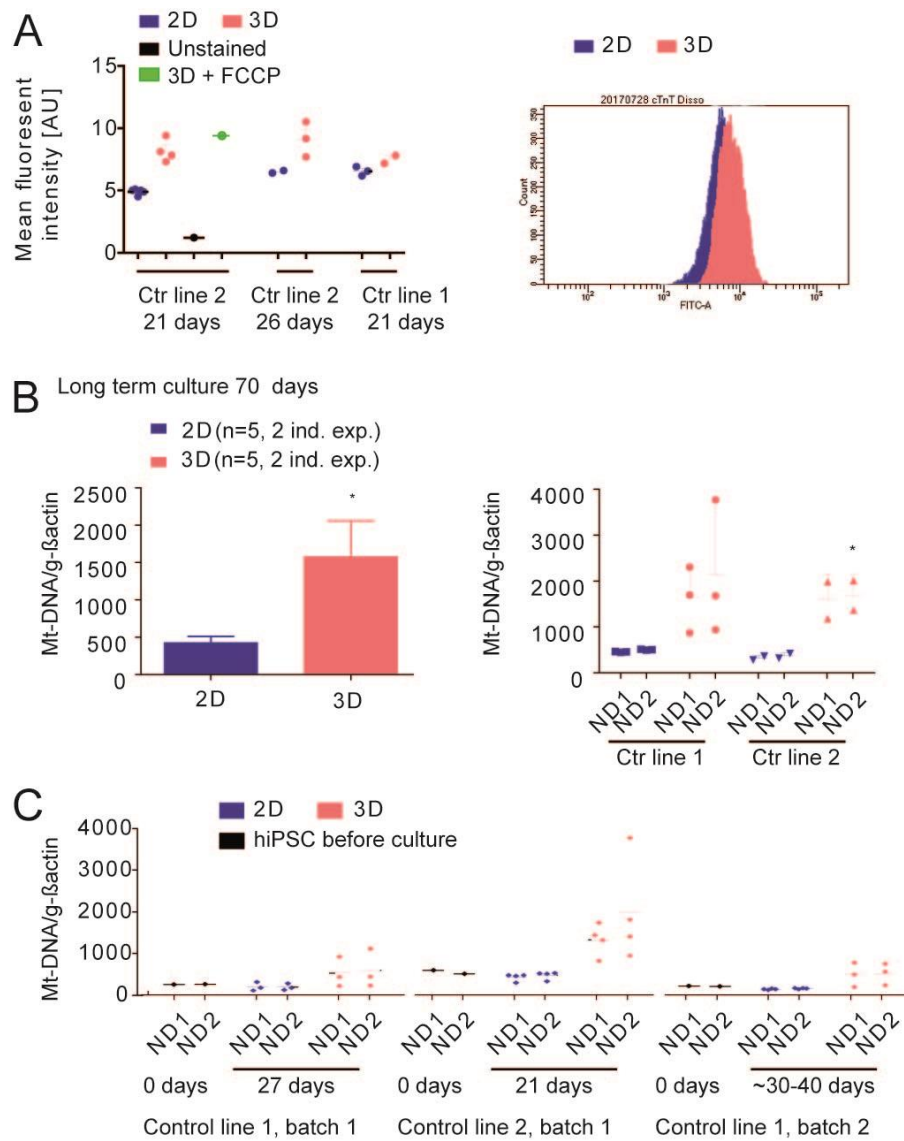

**Figure S4: Analysis of mitochondrial DNA content and mass (supplementary to Figure 4).**

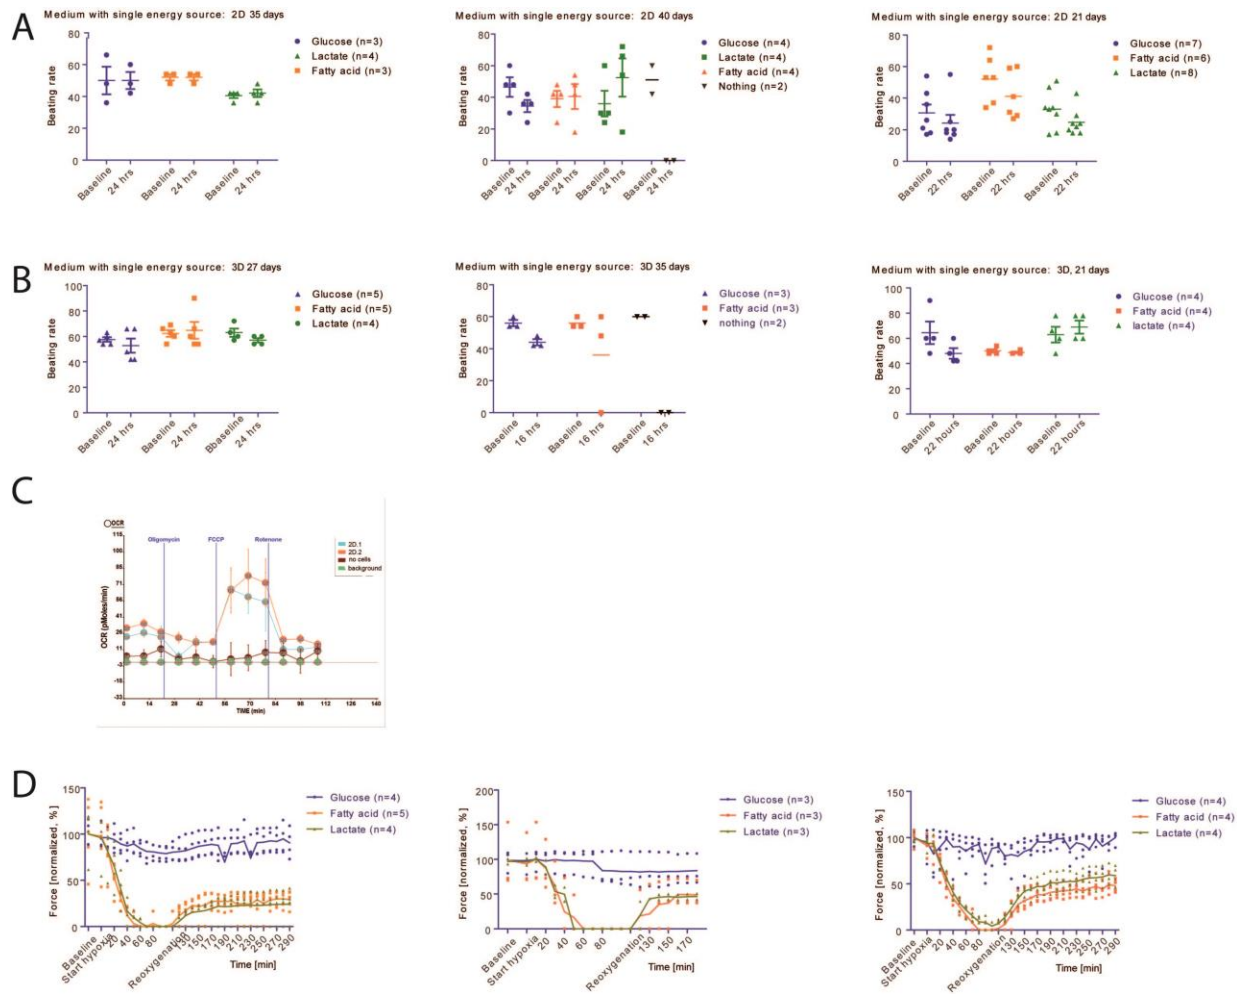

**Figure S5: Depiction of different cell lines for contractile parameters such as force and beating rate and bioenergetic analysis utilizing the Seahorse XF24 analyzer and the extracellular flux assay kit (supplementary to Figure 5).**

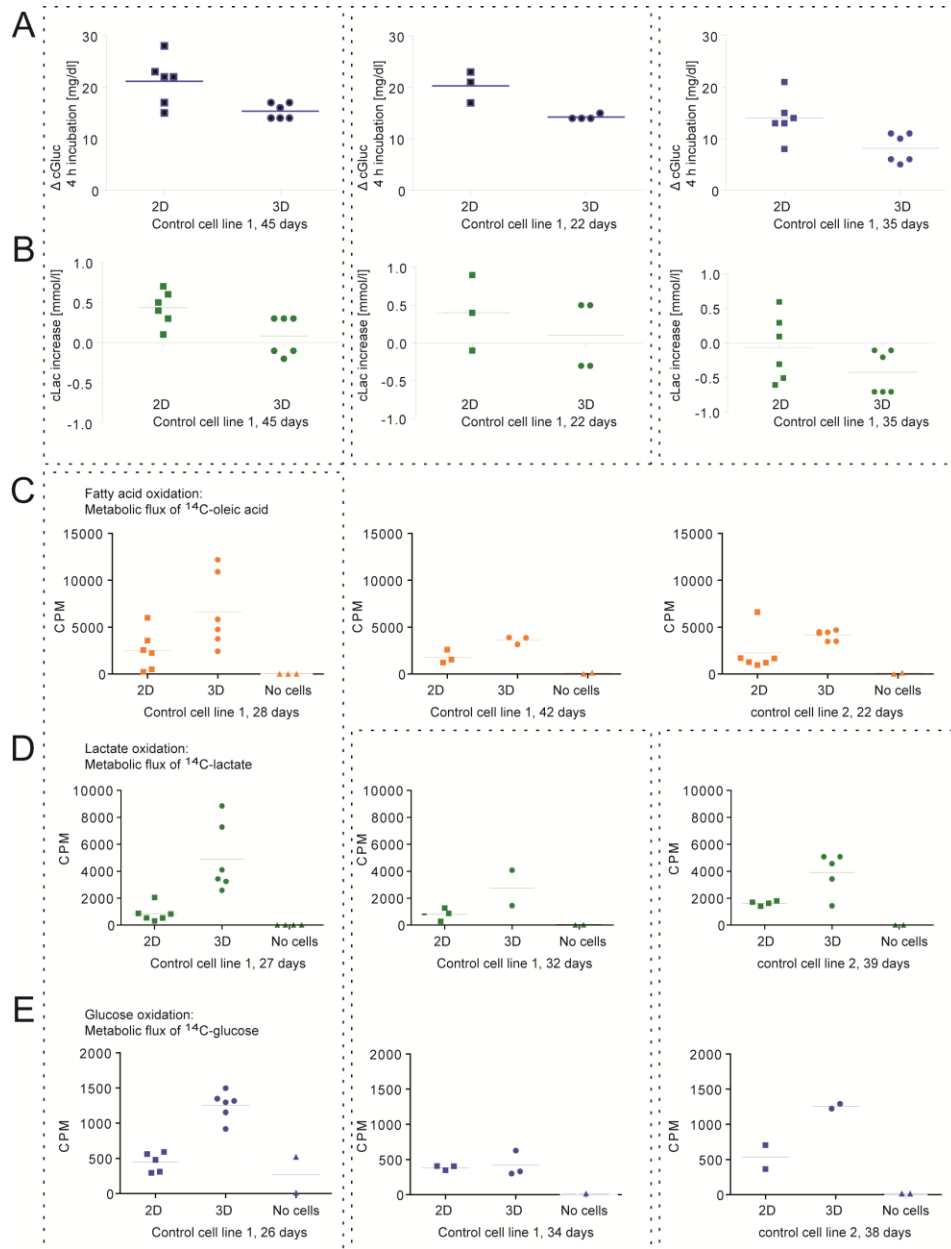

**Figure S6: Depiction of raw data of independent experiments of both control cell lines for the analysis of metabolic flux (supplementary to Figure 6).**

**A** 3D culture:  
Correlation of mitochondrial DNA content and force

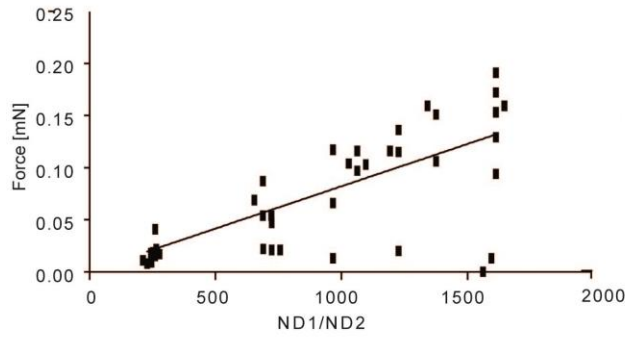

**B** 3D culture:  
Correlation of mitochondrial DNA content and beating frequency

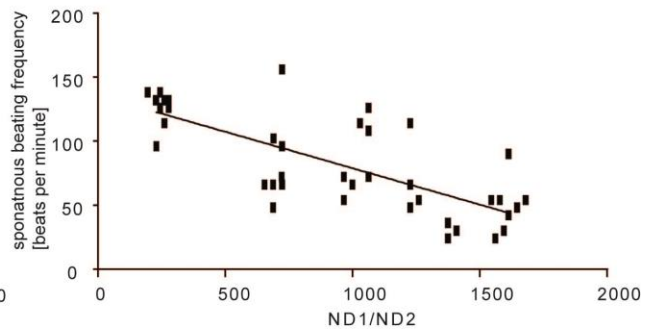

**C** 2D culture: Mitochondrial DNA content after blebbistatin/BTS treatment

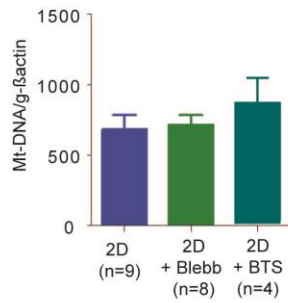

**D** 2D culture: individual experiments, data combined in A.  
Sample date: 21 days. Treatment between day 14-21.

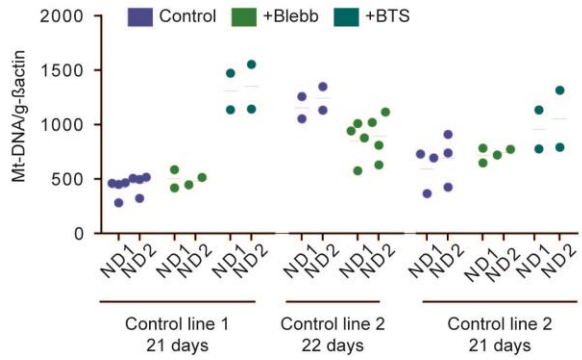

**Figure S7: Analysis of mitochondrial DNA content (supplementary to Figure 7).**

## Legends for Supplemental Figures 1-7

### Figure S1: Overview of control cell lines (supplementary to Figure 1).

(A) Overview of cell lines (control cell line 1: C25, (Moretti et al., 2010); ERC018, stem cell facility of the UKE, Hamburg) and experiments. (B) Baseline measurements in complete culture medium, spontaneous beating frequency (beats per minute) over time. Same EHTs shown in Figure 1C. Each dot represent one EHT. (C-F) Additional representative transmission electron microscopy pictures of 3D and 2D hiPSC-CM (open arrowhead in C, E, F: glycogen granules; black arrowhead: Z-line; white arrowhead: sarcomere; black arrow: mitochondria with features of maturity; white arrow: immature mitochondria).

### Figure S2: Work flow of mass spectrometry and protein ontology/canonical pathway analyses (supplementary to Figure 2).

(A) Work flow of sample preparation for mass spectrometry. (B) Scatter plots of log<sub>10</sub> normalized spectral counts to characterize potential variance between samples per group. (C) Gene ontology (GO) analysis for biological processes determined by Genomatrix Genome Analyzer (GGA<sup>®</sup>) of proteins with significant higher abundance in 3D versus 2D. Demonstration of molecular targets (here named with the gene symbol) of top 1 hit “cellular respiration”. (D) Ingenuity Pathway Analysis (IPA<sup>®</sup>) of proteins significantly different between 2D and 3D. Demonstration of annotated pathways and sorting by the  $-\log(p\text{-value})$ . The p-value was calculated by IPA based on a Fisher’s exact test. The percentage characterizes the number of identified genes as being associated with each pathway. The number characterizes the total number of genes annotated with each pathway. Targets in green are considered to be downregulated in 3D, targets in red are considered to be upregulated in 3D. (E-F) Panther analysis for involved pathways of proteins with higher abundance in 3D (E) and involved protein classes (F).

### Figure S3: Gene ontology and KEGG pathway analysis performed for specific clusters (supplementary to Figure 3).

(A) Cluster analysis of 2D, 3D and non-failing human heart were subjected to gene ontology and KEGG pathway enrichment analysis. Clusters are labeled from a-g. (B) Clusters from a-g with respective gene ontology (GO) and KEGG pathway information and enrichment score. Only significant enrichment scores  $> 1.5$  were selected.

### Figure S4: Analysis of mitochondrial DNA content and mass (supplementary to Figure 4).

(A) Mean fluorescent intensities of 2D vs. 3D for mitotracker green FM live stain depicted for different control (ctr) cell lines and 3 individual experiments. Each dot represents 1 experiment with pool of cells from 3 dissociated EHTs. FCCP treatment: Addition of 1  $\mu\text{M}$  FCCP, 5 minutes pre-treatment before staining and during Mitotracker green FM live stain. Overlay of representative flow cytometry peaks (2D versus 3D). (B, C) PCR-amplification of genomic DNA for NADH dehydrogenase (Mt-ND1/2) normalized to the nuclear encoded gene actin; samples generated from 2 independent experiments. (B) mtDNA content (Mt-ND1, ND2) normalized to the nuclear encoded gene actin) after 70 days of culture time. Left panel: means  $\pm$  SEM, right panel: Scatter dot plot depiction of left panel, each dot represents one biological replicate and the mean of three technical replicates; statistical analysis: (B, left) two-tailed, unpaired t-test between 2D and 3D, (B, right) two-way ANOVA with Bonferroni post test. \*:  $p \leq 0.05$ . (C) PCR-amplification of genomic DNA for NADH dehydrogenase (Mt-ND1/2) normalized to the nuclear encoded gene actin of 2D versus 3D hiPSC-CM. Scatter dot plot depiction of 3 independent experiments, mean of this data is presented in Figure 4F. Each dot represents one biological replicate, mean of 3 technical replicates.

### Figure S5: Depiction of different cell lines for contractile parameters such as force and beating rate and bioenergetic analysis utilizing the Seahorse XF24 analyzer and the extracellular flux assay kit (supplementary to Figure 5).

(A, B) Cell line specific depiction of experiments shown in Figure 5A, B. (C) Measurements of respiration rates (ocr, oxygen consumption rate) per 20 000 2D plated cardiomyocytes per well in XF assay medium with sodium pyruvate (1 mM), L-glutamine (4 mM) and galactose (10 mM). Basal respiration, endogenous rate; oligomycin (1  $\mu\text{M}$ ); FCCP (0.5  $\mu\text{M}$ ); Rotenone (2  $\mu\text{M}$ ); samples generated from 1 experiments. (D) Cell line specific depiction of experiments shown in Figure 5C.

**Figure S6: Depiction of raw data of independent experiments of both control cell lines for the analysis of metabolic flux (supplementary to Figure 6).**

(A, B) Raw data (CPM of radioactive CO<sub>2</sub> trapped in filter paper) of individual experiments. Dashed boxes define independent experiments. Same data depicted as mean ± SEM displayed in Figure 6B, C. (C-E) Raw data (CPM of radioactive CO<sub>2</sub> trapped in filter paper) of independent experiments. Same data depicted as mean ± SEM displayed in Figure 6 D, E, F. Dashed boxes define experiments conducted with hiPSC-CMs derived from the same differentiation batch but at different time points. Each dot represents one biological replicate, mean of 2 technical replicates.

**Figure S7: Analysis of mitochondrial DNA content (supplementary to Figure 7).**

(A, B) Correlation of mitochondrial DNA content with force (A), and frequency (B) of experiments shown in Figure 7. (C, D) PCR-amplification of genomic DNA for NADH dehydrogenase (*Mt-ND1/2*) normalized to the nuclear encoded gene actin of 2D ± Blebbistatin (Blebb) and ± BTS. (C) Means ± SEM (D) Scatter dot plot depiction of left panel, each dot represents one biological replicate (mean of three technical replicates) from three independent experiments.



## Supplemental Experimental Procedures

### Human heart samples

Non-failing left ventricular myocardium utilized in Fig. 3 was obtained from 3 female donor hearts (National Disease Resource International; Philadelphia, PA) that could not be used for transplantation due to technical problems or the age of the donor. All non-failing hearts were normal in size and had no infarcts. Random sections had normal histology. Full details of the samples are previously described (Steenbergen et al., 2003). The heart samples in Fig. 4 were composed of one non-failing heart sample and two failing heart samples. Failing hearts were obtained from patients undergoing heart transplantation due to terminal heart failure caused by dilative cardiomyopathy or ischemic heart disease. Tissues from one non-failing donor heart that could not be transplanted was used for comparison. The study was reviewed and approved by the Ethical Committee of the University Medical Center Hamburg-Eppendorf (Az. 532/ 116/9.7.1991) and all patients gave written informed consent.

### Sample preparation for mass spectrometric analysis

HiPSC-CM were cultured in either 2D ( $2 \times 10^6$  cells/6-well; coating: 0.1% gelatin, 1 h) or 3D ( $0.8 \times 10^6$  cells/EHT) for 21 days in parallel. Finally, cells were washed twice with PBS and digested with collagenase II (in HBSS, 200 U/ml; Worthington) for 4–5 h, reaction was stopped with fetal calf serum, centrifugated at 100 g for 15 min and washed twice with PBS. Cells of one 6-well or cells of 2 EHTs were snap frozen in 100  $\mu$ l M-PER Mammalian Protein Extraction Reagent plus phosphatase and protease inhibitors (Thermo Scientific). Frozen human heart samples were cut into pieces and lysed in an ice-cold buffer containing sucrose 300 mM, HEPES-NaOH 250 mM, EDTA 1 mM, pH 8, plus EDTA-free protease inhibitor (Roche). The tissue was homogenized using a tissue disruptor (Precellys 24, setting 6500-2x20-020) at 4°C and the samples were incubated for 15 min on ice. Insoluble cell debris was pelleted (14,000 rcf for 20 min) and the resulting supernatant was used for analysis. Protein concentrations in all sample groups were measured with a BCA protein assay kit (Pierce). 100  $\mu$ g of each sample lysate was used for acetone precipitation of proteins by adding the 8x volume of acetone (-20 °C, overnight). The next day, precipitated proteins were pelleted (high speed spin, 12 °C, 10 min). The acetone was removed and the dry protein pellet was dissolved in guanidine hydrochloride (8 M, solution ready to use, Sigma G9284). The protein pellet was subjected to an in-solution-digestion. Briefly, the mixture was reduced using dithiothreitol (10 mM, DDT, Sigma 43815) in 25 mM TEA-Bic solution (25 mM triethylammonium bicarbonate, Sigma T7408) for 1 h at 60°C. Samples were subjected to alkylation (30 mM iodoacetamide, Sigma I1149) in 25 mM TEA-Bic solution for 1 h at 37 °C in the dark. The reaction was quenched with DTT (10 mM, Sigma 43815). Afterwards, the samples were diluted with 25 mM TEA-Bic solution to a concentration of guanidine hydrochloride <1 M. The samples were digested overnight at 37°C in digestion buffer containing Sequencing Grade Modified Trypsin (1  $\mu$ g/ $\mu$ l, protein:enzyme ratio of approximately 20:1; Promega v5111). The next day, the tryptic peptides were acidified with 100% of formic acid to pH < 3. The samples were desalted and concentrated with ZipTip Pipette Tips (Millipore, ZTC18S096) filled with a C-18 column as described in the manufacturer's instructions. The collected eluents were vacuum-dried by SpeedVac and resolubilized in 0.1% formic acid.

### Data analysis of mass spectrometry

MS2 spectra were processed using the Proteome Discoverer software (version 1.4.1.14, Thermo Fisher Scientific). Briefly, the data was searched against the Swiss Prot (Swiss Institute of Bioinformatics) database, taxonomy "Homo sapiens [human]" using the Mascot (Matrix Science, London, UK) search engine with precursor mass tolerance at 20 ppm, fragment ion mass tolerance at 0.8 Da, trypsin enzyme with 2 miscleavages with carbamidomethylation of cysteine as fixed modification and deamidation of glutamine and asparagine, oxidation of methionine as variable modifications. The resulting data file was loaded into the Scaffold software (version scaffold\_4.3.4, Proteome Software Inc., Portland, OR, USA) to filter and quantify the peptides and proteins. For protein identification, filters were set to a 90% protein probability threshold and a 90% peptide probability threshold, which resulted in a final decoy FDR of less than 0.1%. For protein identification, at least 2 peptides per protein had to be recognized. Data analysis and clustering was performed in the Scaffold software. In general, relative quantification was done in a label-

free approach by the setting Quantitative Value (Normalized Total Spectra). For comparison, the total number of spectral counts identified for each proteins were visualized and compared to the counterpart. For statistical analysis only proteins identified in 3/3 samples were used for comparative analysis. For a quantitative analysis of specifically unique peptides to precisely distinguish between protein isoforms, the measured peak areas from Proteome Discoverer were analyzed using Scaffold and the Multiplex Quantitation method. Protein FDR was set to 1.0% and Peptide FDR to 0.1% with a minimum of 2 peptides. Quantitative analysis was performed by adjusting the reference group to the 2D samples. To display the comparison the setting was adjusted to fold change ratio. No minimal fold change threshold was applied.

### **Pathway, regulator effects and protein class analysis of differentially expressed proteins**

Proteins identified as being significantly different between 2D- and 3D-cultured hiPSC-CM underwent canonical pathway analysis by the Ingenuity Pathway Analysis (IPA<sup>®</sup>) software. Evaluated were their annotation to canonical pathways and the sorting was performed by the  $-\log(p\text{-value})$ . The p-value was calculated by IPA<sup>®</sup> based on a Fisher right-tailed exact test.  $P < 0.05$  was considered as statistically significant. Additionally, proteins which were significantly different between 2D and 3D underwent the analysis of regulator effects by IPA<sup>®</sup> and the effector networks with the highest consistency scores were determined. PANTHER pathway classification system (<http://www.pantherdb.org/pathway/>) was used for protein class analysis of proteins that were significantly enriched in 3D samples.

### **Sample preparation and Western blot**

2D and 3D sample lysates, which were used for mass spectrometric analysis, underwent Western blot analysis. Equivalent amounts of protein (25  $\mu\text{g}$ ) from each sample were separated on NuPAGE 4–12% Bis-Tris gels (Invitrogen, Carlsbad, USA) and transferred to nitrocellulose membranes. Gel transfer efficiency and equal load was verified using reversible Ponceau staining. The resulting blots were probed with an anti-THIM (ACAA2, sc-100847, Santa Cruz, USA) antibody (1:200 dilution), an anti-ATP5H (ab110275, Abcam, USA) antibody (1:1000 dilution), an anti-COX-Va (MS409, Mito Sciences, USA) antibody (1:1000 dilution) to probe for mitochondrial proteins involved in  $\beta$ -oxidation and respiration. Membranes were probed with an anti- $\beta$ -actin antibody to verify equal loading (sc-47778, Santa Cruz, USA). The membranes were incubated with a secondary antibody coupled with HRP conjugate targeted against mouse (7076S, Cell Signaling, USA) or rabbit (7074S, Cell Signaling, USA) and analyzed with ECL (GE Healthcare). Quantification of the bands was performed using ImageJ.

### **Flow cytometry**

EBs, 2D and 3D samples were collagenase dissociated and 200 000 cells each were fixed in methanol and stained with anti-cardiac troponin T-FITC (Miltenyi, clone REA400) as previously described (Mannhardt et al., 2016). REA Control (I)-FITC was used for an isotypic control staining. Mitochondrial mass was detected by flow cytometry of collagenase dissociated living single cells, stained for 30 minutes in 0.5  $\mu\text{M}$  MitoTracker Green FM (M7514, Molecular Probes). Unstained cells served as control. All flow cytometry was done in the UKE core facility with a BD FACSCanto<sup>™</sup> II (Biosciences) cytometer.

### **Quantitative PCR for relative mitochondrial DNA content and PGC1alpha/ESSRA**

Experimental procedure and primer sequences as published in (Burkart et al., 2016). In brief, genomic and mitochondrial DNA was extracted from the organic phase after separation in Trizol by DNA precipitation with ethanol. DNA was washed twice with 0.1% sodium citrate/10% ethanol solution and with 75% ethanol. Pellet was dissolved in sterile water shaking over night at 37°C. Quantitative PCR was done on the AbiPrism 7900HT Fast Real-Time PCR System (Applied Biosystems) utilizing SYBR Green/ROX qPCR Master Mix (K0222, Thermo Scientific), using primers for mitochondrially encoded NADH dehydrogenase 1 (mt-ND1) or 2 (mt-ND2); values were normalized to the nuclear gene ACTB. Primer sequences as described in (Burkart et al., 2016): mt-ND1for: 5'-ATGGCCAACCTCCTACTCCTCATT-3' mt-ND1rev: 5'-TTATGGCGTCAGCGAAGGGTTGTA-3'; mt-ND2for:

5'-CCATCTTTGCAGGCACACTCATCA-3'; mt-ND2rev: 5'-ATTATGGATGCGGTTGCTTGCCTG-3'; ACTB (actin, beta) ACTB\_for: 5'-CATGTACGTTGCTATCCAGGC-3', ACTB\_rev: 5'-CTCCTTAATGTCACGCACGAT-3'. Values represent the mean of 3 technical replicates. RNA was extracted from the aqueous phase with a isopropanol precipitation. 500 ng of RNA were transcribed into cDNA with the High-Capacity cDNA Reverse Transcription Kit (4368814, Thermo Fisher). Controls without reverse transcription (-RT) served as negative controls. ESRR\_for: 5'-GCCCTCACTACACTGTGTGAC-3'; ESRR\_rev: 5'-CCTGCTAATTTGGACTGGTCTT-3'; PGC\_for: 5'-CAGGCGATGGTGCAACTCATA. PGC\_rev: 5'-CAGAGCACGTCTTGAGCCA-3'. TNT for: CTGGAGAGAGGACGAAGACG, TNT rev: TTTGGTTTGGACTCCTCCAT; MYL3 for: AAGCCTTCATGCTGTTTCGAC, MYL3 rev: GCCTGTGTCCTTGTCTTGG; MYL4 for: CCACGTCTCTCGGTTTCTTCTT, MYL4 rev: CTCTTCAATCTGGTCGGCAGT, Vimentin for: GCAGGAGGAGATGCTTCAGA, Vimentin rev: GCAGCTCCTGGATTTCTCT; Periostin for: GAGGCTTGGGACAACCTTGA, Periostin rev: ACAGTGACAACCCATTAGGA; CD31 for: GGTCTGAGGGTGAAGGTGA; CD31 rev: GGGTTTGCCTCTTTTCTC. Glucuronidase beta GUSB\_for: 5'-AAACGATTGCAGGGTTTCAC-3'; GUSB\_rev: 5'-CTCTCGTCGGTGAAGGTGA-3'.

### **Transmission electron microscopy**

For transmission electron microscopy (TEM), 3D and 2D-cultured hiPSC-CM were washed twice in PBS and fixed 30 min in glutaraldehyde (0.36%, pH 7.0-7.5, 4 °C). Prefixed 2D cells were removed as a full layer by scraping and pelleted. Prefixed EHTs were removed from silicone racks and further fixed in glutaraldehyde in osmium tetroxide solution (1%, 2 h; Science Services, 19110), dehydration and embedding in a glycidether-based resin. Ultra-thin sections (50 nm) were prepared and analyzed on a Zeiss LEO 912AB.

### **Restrictive feeding experiments**

Baseline beating rate was analyzed in fresh complete medium. 2D and 3D-cultured hiPSC-CM were washed twice in DMEM without glucose (7455, Gibco) and then incubated for 10 min in 1.5 ml of the respective single-energy containing media. The medium was replaced once again and cells were incubated until the next day (22-26 hours of incubation). At the end of the experiment, beating frequency was analyzed again. For 3D, frequency and force was determined by video-optical recording before and after incubation. For 2D, frequency was determined by marking 2 foci (technical replicates) per 24-well containing 0.8x10<sup>6</sup> hiPSC-CMs. Contractions per minute were counted microscopically for each foci before and after incubation. 3-4 wells (biological replicates) per condition were analyzed, 2D data represents mean of the two foci.

### **Hypoxia and reoxygenation treatment**

3D cultured hiPSC-CM were pre-incubated in the respective single-energy containing medium as described in restrictive feeding experiments. Baseline was measured in the EHT analysis equipment (A001, EHT Technologies) by video-optical recording with a gas flow of CO<sub>2</sub> 35 ml/min, N<sub>2</sub> 265 ml/min, O<sub>2</sub> 200 ml/min. Gas composition was changed (CO<sub>2</sub> 35 ml/min, N<sub>2</sub> 465 ml/min, O<sub>2</sub> 0 ml/min) After 100 minutes oxygen supply was switched on again (CO<sub>2</sub> 35 ml/min, N<sub>2</sub> 265 ml/min, O<sub>2</sub> 200 ml/min), allowing reoxygenation.

### **Analysis of glucose consumption and lactate production**

2D and 3D hiPSC-CM in 24 well format with 800 000 hiPSC-CM per sample were washed and then incubated for 10 min in 1.5 ml serum free full medium each. The medium was replaced once again and cells were cultured for 4 hours of incubation. Supernatant medium was collected and cGluc (concentration of glucose) as well as cLac (concentration of lactate) was measured utilizing a blood gas analyzer ABL90 blood gas analyzer (Radiometer). Glucose consumption was calculated as the initial cGluc of the medium before the 4 hours of incubation subtracted from cGluc after incubation. Lactate production was calculated by subtracting cLac after incubation from initial cLac.

## Metabolic flux of <sup>14</sup>C-labeled glucose, lactate and oleic acid

800 000 cells of either 2D or 3D hiPSC-CM per well were washed twice in serum-free full medium and then pre-incubated for 1 hour in serum-free full medium. After that, this medium was exchanged by serum-free full medium containing 0.0037 MBq/ml of one radioactive-labeled energy substrate and in addition 1 mM HEPES to ensure trapping of radioactive CO<sub>2</sub> in the buffered medium. While <sup>14</sup>C-D-glucose (NEC042 PerkinElmer) and <sup>14</sup>C-lactic acid (sodium salt, NEC599, PerkinElmer) was added directly to the incubation medium, <sup>14</sup>C-oleic acid (NEC317, PerkinElmer) was brought into solution in a two-step procedure. First, at 54 °C all solvent was evaporated. Then, oleic acid was brought into solution by shaking it for one hour at 37 °C in full medium with 2% BSA as carrier. After 4 hours of incubation time allowing 2D and 3D hiPSC-CM to metabolize the isotope labeled energy substrates, 1 ml of supernatant was collected in a separate 24 well. 100 µl perchloric acid was added and immediately Whatman filter paper circles saturated with 3 M NaOH was placed on top of the wells. After 90 minutes of incubation in a closed chamber, Whatman filter paper was placed in 10 ml of Rotiscint eco plus (0016.3, Carl Roth) and the amount of radioactive CO<sub>2</sub> trapped in the filter paper was analyzed as counts per minute (CPM) in the liquid scintillation counter TriCarb 2900TR (Packard). Values represent means of two technical replicates. To calculate the amount of radioactive CO<sub>2</sub> produced, CPM was recalculated as decay per minute, Bq= CPM/60\*96% (Figure 6 D-F) Total amount of radioactive CO<sub>2</sub> = bq /specific radioactivity per pmol (approximate values given by PerkinElmer: Glucose: bq x 1 pmol / 8 bq, oleic acid: Bq x 1 pmol / 2 bq, lactic acid: Bq x 1 pmol / 4 bq). The ATP production from fatty acid, lactate and glucose oxidation (Figure 6 G) was calculated based on metabolized energy substrate in relation to the input amount of substance:

Metabolized energy substrate = N/M\*K; N = <sup>14</sup>CO<sub>2</sub> [Bq]; M=Input radioactivity [<sup>14</sup>C-lactate, <sup>14</sup>C-fatty acid, or <sup>14</sup>C-glucose [Bq]]; K= Input amount of substance (Lactate, fatty acid or glucose [M]). The amount of ATP produced under assumption of a completely efficient production was calculated by multiplying the metabolized energy substrate with 33 per glucose molecule, and 15 per lactic acid molecule (Lopaschuk and Jaswal, 2010) 127,1 per oleic acid molecule (Peter C. Heinrich, Matthias Müller, 2014). As an alternative approximation to calculate glycolysis/oxidation ratios we used data from lactate production (Figure 6C) to calculate ATP production by anaerobic glycolysis. The increase in lactate (280 nM for 2D, 113 nM for 3D) is the sum of large lactate production and small lactate oxidation (1-3 nM, about 1% in our experiments, Figure 6C, G), which we ignored in the following calculations. Given that during anaerobic glycolysis 1 Glucose is broken down to 2 molecules of lactate producing 2 molecules of ATP, we can estimate the total production of ATP by anaerobic glycolysis with 280 nM for 2D and 113 nM for 3D.

## Media composition and drug treatments

Complete medium was used to culture 2D and 3D hiPSC-CM. Medium was changed 3x per week and consisted of Dulbecco's MEM (F0415, Biochrom), 10% horse serum, inactivated (Biochrom), 1% penicillin/streptomycin (15140, Gibco), insulin (10 µg/ml, 857652, Sigma-Aldrich) and aprotinin (33 µg/ml, A1153, Sigma-Aldrich). Serum-free medium consisted of DMEM without D-glucose, without L-glutamine, and without sodium pyruvate (7455, Gibco), 1% penicillin/streptomycin (15140, Gibco), insulin (10 µg/ml, 857652, Sigma-Aldrich), 0.25 mM L-carnitine hydrochloride (C0283, Sigma) with the addition of 1 mM linoleic acid/oleic acid fatty acid mix (L9655, Sigma), 1 mM lactate (7455, Sodium lactate solution 50%, Caelo), 5 mM D (+)-glucose anhydrous (X997, Roth). Single energy substrate media for restrictive feeding experiments were prepared as specified above, but only one of the energy sources was added. (S)-(-)- Blebbistatin (SC-204253, Santa Cruz, stock concentration: 10 mM in DMSO, was freshly diluted to 300 nM in complete medium) or N-benzyl-p-toluene sulphonamide (BTS, 1870, Tocris, stock 30 mM in DMSO, was freshly diluted to 20 µM in complete medium with daily medium change during the 7 day incubation period between day 14 and day 21 of hiPSC-EHT development. Concentration on BTS and Blebbistatin were chosen on a approximative 50% reduction of contractile force in 3D. These concentrations align well with literature data (Cheung et al., 2002; Straight et al., 2003). The same concentrations also led to a substantial weaker contraction in 2D, as observed in light microscopy.

## Supplemental References

Burkart, A.M., Tan, K., Warren, L., Iovino, S., Hughes, K.J., Kahn, C.R., and Patti, M.-E. (2016). Insulin Resistance in Human iPS Cells Reduces Mitochondrial Size and Function. *Sci. Rep.* 6, 22788.

Cheung, A., Dantzig, J.A., Hollingworth, S., Baylor, S.M., Goldman, Y.E., Mitchison, T.J., and Straight, A.F. (2002). A small-molecule inhibitor of skeletal muscle myosin II. *Nat. Cell Biol.* 4, 83–88.

Lopaschuk, G.D., and Jaswal, J.S. (2010). Energy Metabolic Phenotype of the Cardiomyocyte During Development, Differentiation, and Postnatal Maturation. *J. Cardiovasc. Pharmacol.* 56, 130–140.

Mannhardt, I., Breckwoldt, K., Letuffe-Brenière, D., Schaaf, S., Schulz, H., Neuber, C., Benzin, A., Werner, T., Eder, A., Schulze, T., et al. (2016). Human Engineered Heart Tissue: Analysis of Contractile Force. *Stem Cell Reports* 7, 29–42.

Moretti, A., Bellin, M., Welling, A., Jung, C.B., Lam, J.T., Bott-Flügel, L., Dorn, T., Goedel, A., Höhnke, C., Hofmann, F., et al. (2010). Patient-Specific Induced Pluripotent Stem-Cell Models for Long-QT Syndrome. *N. Engl. J. Med.* 363, 1397–1409.

Peter C. Heinrich, Matthias Müller, L.G. (2014). *Löffler/Petrides Biochemie und Pathobiochemie* (Berlin, Heidelberg: Springer Berlin Heidelberg).

Steenbergen, C., Afshari, C.A., Petranka, J.G., Collins, J., Martin, K., Bennett, L., Haugen, A., Bushel, P., and Murphy, E. (2003). Alterations in apoptotic signaling in human idiopathic cardiomyopathic hearts in failure. *Am. J. Physiol. - Hear. Circ. Physiol.* 284.

Straight, A.F., Cheung, A., Limouze, J., Chen, I., Westwood, N.J., Sellers, J.R., and Mitchison, T.J. (2003). Dissecting temporal and spatial control of cytokinesis with a myosin II Inhibitor. *Science* 299, 1743–1747.

### **Supplemental Information for legends of the video files**

#### Movie S1

Video documentation of hiPSC-CM in EB format at the end of differentiation, 2D monolayer and 3D EHT format. Supplemental to Figure 1.

#### Movie S2

Video documentation of hiPSC-CM in EHT format in restrictive feeding experiment (Supplemental to Figure 5): EHTs supplemented with glucose, lactate or fatty acid cultivated in normoxia and hypoxia.
